# Supplementary material
Source: PubMed Central journal article supplement (PMC4136703)

# Zinc(II) Catalyzed Conversion of Alkynes to Vinyl Triflates in the Presence of Silyl Triflates

Mohammed H. Al-huniti and Salvatore D. Lepore\*

Department of Chemistry, Florida Atlantic University, Boca Raton, FL 33431-0991.

## Table of Contents

|                                                                                                  |     |
|--------------------------------------------------------------------------------------------------|-----|
| General Information                                                                              | S2  |
| Materials                                                                                        | S2  |
| General procedure                                                                                | S2  |
| Spectral Data                                                                                    | S3  |
| Formation of vinyl triflate <b>10a</b> in presence of various amounts of water                   | S6  |
| <sup>1</sup> H-NMR and <sup>13</sup> C-NMR spectra for compound <b>1a</b> - <b>12a</b>           | S7  |
| <sup>1</sup> H-NMR and <sup>13</sup> C-NMR spectra Suzuki coupling with vinyl triflate <b>1a</b> | S19 |

**General Information.** Reactions were carried out under an argon atmosphere (unless otherwise stated) in oven dried glassware with magnetic stirring. Purification of reaction products was carried out using flash silica gel 40-63 $\mu$ . Analytical thin layer chromatography was performed on 0.25mm silica gel 60-F plates. Visualization was accomplished with UV light and aqueous potassium permanganate solution staining followed by air drying.  $^1\text{H}$  NMR was recorded on a 400 MHz spectrometer and are reported in ppm using solvent as an internal standard ( $\text{CDCl}_3$  at 7.26 ppm). Data are reported as: (b = broad, s = singlet, d = doublet, t = triplet, q = quartet, p = pentet, m = multiplet; coupling constant(s) in Hz, integration).  $^{13}\text{C}$  NMR were recorded on 100 MHz spectrometer. Chemical shifts are reported in ppm, with solvent resonance employed as the internal standard ( $\text{CDCl}_3$  at 77.16 ppm).

**Materials:** All reagents were purchased from commercially available sources and were used without further purification.

### **General procedure for the formation of vinyl triflate**

In an oven dried vial containing a teflon-clad magnetic stirrer was added alkyne (1mmol), zinc (II) triflate (0.1mmol) and  $\text{CDCl}_3$  (3 mL). To that solution was added TMSOTf (1.5 mmol) in one portion and the reaction was allowed to stir at room temperature while monitoring by  $^1\text{H}$  NMR. After completion, silica gel (200 mg) was added (to hydrolyze excess TMSOTf) and the mixture was filtered through cotton rinsing with dry chloroform. The resulting solution was evaporated under a stream of argon then under high vacuum (0.01 torr) for 1 h.

## Spectral data:

**(3,3-dimethylbut-1-yn-1-yl)benzene**<sup>1</sup>: <sup>1</sup>H-NMR (400MHz, CDCl<sub>3</sub>): δ 1.32 (s, 9H), 7.25-7.27 (m, 3H), 7.27-7.39 (m, 2H); <sup>13</sup>C-NMR (100 MHz, CDCl<sub>3</sub>): δ 28.1, 31.3, 79.2, 98.7, 124.3, 127.6, 128.3, 131.7.

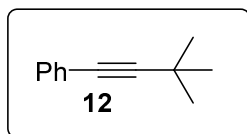

**(3-methylbut-1-yn-1-yl)benzene**<sup>2</sup>: <sup>1</sup>H-NMR (400MHz, CDCl<sub>3</sub>): δ 1.39 (d, 9H), 2.8 (m, 1H), 7.26-7.29 (m, 3H), 7.40-7.42 (m, 2H); <sup>13</sup>C-NMR (100 MHz, CDCl<sub>3</sub>): δ 21.4, 23.3, 80.0, 96.0, 124.3, 127.7, 128.4 131.8. HRMS calc. for C<sub>11</sub>H<sub>13</sub> [M+H]<sup>+</sup>: 145.1017 Found: 145.1020

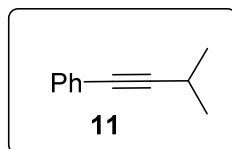

**1-phenylvinyl trifluoromethanesulfonate**<sup>3</sup>: <sup>1</sup>H-NMR (400MHz, C<sub>6</sub>D<sub>6</sub>): δ 4.85 (d, *J* = 4Hz, 1H), 4.89 (d, *J* = 4Hz, 1H), 7.41 (d, *J* = 8 Hz, 2H), 7.56 (d, *J* = 8 Hz, 2H); <sup>13</sup>C-NMR (100 MHz, C<sub>6</sub>D<sub>6</sub>): δ 105.0, 118.6 (q, *J*<sub>C-F</sub> = 318 Hz), 125.5, 128.3, 128.9, 130.2, 153.7).

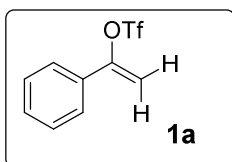

**1-(4-bromophenyl)vinyl trifluoromethanesulfonate**<sup>4</sup>: <sup>1</sup>H-NMR (400MHz, CDCl<sub>3</sub>): δ 4.42 (d, *J* = 4Hz, 1H), 5.62 (d, *J* = 4 Hz, 1H), 7.41 (d, *J* = 8 Hz, 2H), 7.56 (d, *J* = 8Hz, 2H); <sup>13</sup>C-NMR (100 MHz, CDCl<sub>3</sub>): δ 105.0, 118.6 (q, *J*<sub>C-F</sub> = 318 Hz), 124.9, 126.9, 131.1, 132.3, 152.6.

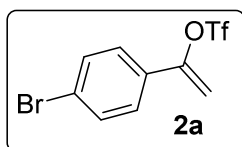

**1-(4-methoxyphenyl)vinyl trifluoromethanesulfonate**: <sup>1</sup>H-NMR (400MHz, CDCl<sub>3</sub>): δ 3.02 (s, 3H), 5.25 (d, *J* = 4 Hz, 1H), 5.46 (d, *J* = 4 Hz, 1H), 6.92 (d, *J* = 12 Hz, 2H), 7.48 (d, *J* = 12 Hz, 2H). This compound was hydrolyzed and 4'-methoxyacetophenone was isolated; <sup>1</sup>H-NMR (400MHz, CDCl<sub>3</sub>): δ 2.54 (s, 3H), 3.85 (s, 3H), 6.91 (d, *J* = 8 Hz, 2H), 7.93 (d, *J* = 8 Hz, 2H); <sup>13</sup>C-NMR (100 MHz, CDCl<sub>3</sub>): δ 26.42, 55.5, 113.7, 127.9, 130.7, 163.5, 196.9.

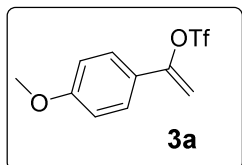

**methyl 4-(1-(((trifluoromethyl)sulfonyl)oxy)vinyl)benzoate**: <sup>1</sup>H-NMR (400MHz, CDCl<sub>3</sub>): δ 1.04 (t, *J* = 7.2 Hz, 3H), 4.39 (t, *J* = 7.2 Hz, 2H), 5.49 (d, *J* = 8Hz, 1H), 7.16 (d, *J* = 8Hz, 1H), 7.61 (d, *J* = 8 Hz, 2H) 8.09 (d, *J* = 8 Hz, 2H); <sup>13</sup>C-NMR (100 MHz, CDCl<sub>3</sub>): δ 14.8, 61.5, 106.4, 118.6(q, *J*<sub>C-F</sub> = 318 Hz), 125.4, 130.2, 132.2, 136.0, 152.6, 165.8.

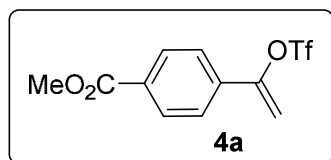

<sup>1</sup> Cahiez, G.; Gager, O.; Buendia, J. *Angew. Chem. Int. Ed.* **2010**, 49, 1278-1281.

<sup>2</sup> Egi, M.; Kawai, T.; Umermura, M.; Akai, S. *J. Org. Chem.* **2012**, 77, 7092-7097

<sup>3</sup> Yang, Y.; Moschetta, E. G.; Rioux, R. M.; *Chem. Cat. Chem.* **2013**, 10, 3005-3013.

<sup>4</sup> Saulnier, M. G.; Kadow, J. F.; Tun, M. M.; Langley, D. R.; Vyas, D. M. *J Am. Chem Soc.* **1998**, 111, 8320.

**hex-1-en-2-yl trifluoromethanesulfonate**<sup>76</sup>: <sup>1</sup>H-NMR (400MHz, CDCl<sub>3</sub>): δ 0.93 (t, *J* = 8 Hz, 3H), 1.39 (m, 2H), 1.51 (m, 2H), 2.34 (t, *J* = 8 Hz, 2H), 4.93 (d, *J* = 4Hz, 1H), 5.09 (d, *J* = 4Hz, 1H); <sup>13</sup>C-NMR (100 MHz, CDCl<sub>3</sub>): δ 13.8, 21.9, 28.2, 33.7, 104.1, 118.6 (q, *J*<sub>C-F</sub> = 318 Hz), 157.2.

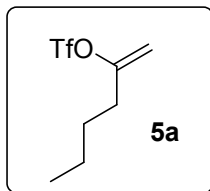

**4-methylpent-1-en-2-yl trifluoromethanesulfonate**: <sup>1</sup>H-NMR (400MHz, CDCl<sub>3</sub>): δ 0.96 (d, *J* = 6.8 Hz, 6H), 1.85-1.95 (m, 1H), 2.2 (d, *J* = 7.2 Hz, 2H), 4.92 (dd, *J* = 3.4, 0.4 Hz, 1H), 5.12 (d, *J* = 3.2 Hz, 1H); <sup>13</sup>C-NMR (100 MHz, CDCl<sub>3</sub>): δ 21.9, 25.6, 43.3, 105.3, 118.5 (q, *J*<sub>C-F</sub> = 315Hz), 156.2.

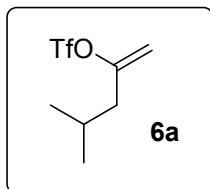

**3,3-dimethylbut-1-en-2-yl trifluoromethanesulfonate**<sup>76</sup>: <sup>1</sup>H-NMR (400MHz, CDCl<sub>3</sub>): δ 1.18 (s, 9H), 4.96 (d, *J* = 4 Hz, 1H), 5.06 (d, *J* = 4 Hz, 1H); <sup>13</sup>C-NMR (100 MHz, CDCl<sub>3</sub>): δ 27.6, 36.6, 99.9, 118.5 (q, *J*<sub>C-F</sub> = 318 Hz), 146.6.

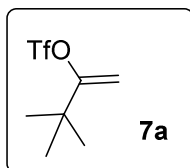

**3-methylbut-1-en-2-yl trifluoromethanesulfonate**<sup>5</sup>: <sup>1</sup>H-NMR (400MHz, CDCl<sub>3</sub>): δ 1.16 (d, *J* = 8 Hz, 1H), 2.56 (m, 1H), 4.93 (dd, *J* = 1.12, 3.6 Hz, 1H), 5.07 (d, *J* = 3.6 Hz, 1H); <sup>13</sup>C-NMR (100 MHz, CDCl<sub>3</sub>) δ 19.9, 33.1, 101.7, 118.6 (q, *J*<sub>C-F</sub> = 318 Hz), 162.3.

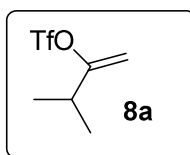

**1-cyclohexylvinyl trifluoromethanesulfonate**: <sup>1</sup>H-NMR (400MHz, CDCl<sub>3</sub>): δ 1.17-1.31 (m, 6H), 1.17-1.18 (m, 4H), 2.15-2.29 (m, 1H), 4.88 (dd, *J* = 4, 2.8 Hz, 1H), 5.05 (d, *J* = 4 Hz, 1H); <sup>13</sup>C-NMR (100 MHz, CDCl<sub>3</sub>) δ 25.7, 25.9, 30.4, 42.4, 101.9, 117.1, 161.6.<sup>6</sup>

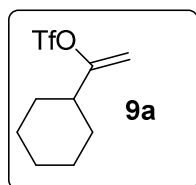

**1-phenylprop-1-en-1-yl trifluoromethanesulfonate**<sup>7</sup>: Two isomers were observed 68:32 *Z*:*E*, for *Z* isomer (major) <sup>1</sup>H-NMR (400MHz, CDCl<sub>3</sub>): δ 1.85 (d, *J* = 8 Hz, 1H), 5.95 (q, *J* = 8 Hz, 1H), 7.37-7.46 (m, 5H). For *E* isomer (minor) <sup>1</sup>H-NMR (400MHz, CDCl<sub>3</sub>): δ 1.95 (d, *J* = 8Hz, 1H), 5.94 (q, *J* = 8 Hz, 1H), 7.37-7.46 (m, 5H).

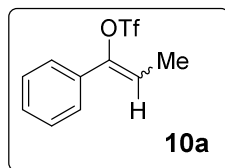

<sup>5</sup> Summerville, R. H.; Senkler, C. A.; Schleyer, P. V.; Dueber, T. E.; Stang, P. J. *J. Am. Chem. Soc.* **1974**, 96, 1100.

<sup>6</sup> Matsubara, S.; Hibino, J.-I.; Morizawa, Y.; Oshima, K.; Nozaki, H. *J. Organomet. Chem.* **1985**, 285, 163.

<sup>7</sup> Luan, L.; Song, J.-S.; Bullock, M. *J. Org. Chem.* **1995**, 60, 7170.

**1-phenylbut-1-en-1-yl trifluoromethanesulfonate:** two isomers were observed 75:25 *Z:E*, for *Z* isomer (major), <sup>1</sup>H-NMR (400MHz, CDCl<sub>3</sub>): δ 1.09 (t, *J* = 8 Hz, 3H), 2.23 (p, *J* = 8 Hz, 2H) 5.85 (t, *J* = 8 Hz, 1H), 7.37-7.46 (m, 5H); <sup>13</sup>C-NMR (100 MHz, CDCl<sub>3</sub>): δ 14.1, 21.1, 118.6 (q, *J*<sub>C-F</sub> = 318 Hz), 125.9, 128.6, 128.7, 130.0, 131.8, 146.7. For *E* isomer (minor), <sup>1</sup>H-NMR (400MHz, CDCl<sub>3</sub>): 1.14 (t, *J* = 8 Hz, 3H), 2.39 (p, *J* = 8 Hz, 2H), 5.83 (t, *J* = 8 Hz, 2H), 7.37-7.46 (m, 5H); <sup>13</sup>C-NMR (100 MHz, CDCl<sub>3</sub>): δ 13.4, 20.4, 118.6 (q, *J*<sub>C-F</sub> = 318 Hz), 125.8, 128.7, 128.8, 129.5, 131.7, 146.7. Hydrolysis of compound **11a** gives Butyrophenone<sup>8</sup>: <sup>1</sup>H-NMR (400MHz, CDCl<sub>3</sub>): δ 1.00 (t, *J* = 7.4 Hz, 3H), 1.77 (m, 2H) 2.94 (t, *J* = 7.4 Hz, 2H), 7.43-7.53 (m, 2H) 7.53-7.56 (m, 1H), 7.95-7.97 (m, 2H); <sup>13</sup>C-NMR (100 MHz, CDCl<sub>3</sub>): δ 14.0, 17.8, 40.5, 128.1, 128.6, 132.9, 137.1, 200.5.

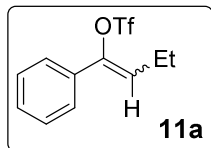

**3-methyl-1-phenylbut-1-en-1-yl trifluoromethanesulfonate** <sup>1</sup>H-NMR (400MHz, CDCl<sub>3</sub>): δ 1.09 (d, *J* = 4Hz, 6H), 2.54 (m, 1H), 5.67 (d, 1H), 7.36-7.44 (m, 5H); <sup>13</sup>C-NMR (100 MHz, CDCl<sub>3</sub>): δ 23.0, 27.5, 118.6 (q, *J*<sub>C-F</sub> = 318 Hz), 126.0, 128.7, 128.9, 130.0, 131.2, 145.6.

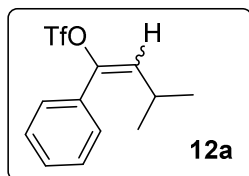

#### Spectral data for Suzuki coupling products:

**1-methoxy-4-(1-phenylvinyl)benzene**<sup>9</sup>: (74% two step yield); <sup>1</sup>H NMR (400 MHz, CDCl<sub>3</sub>) δ 7.32-7.29 (m, 5H), 7.26 (d, *J* = 8.8 Hz, 2H), 6.84 (d, *J* = 8 Hz, 2H), 5.38 (d, *J* = 1.2 Hz, 1H), 5.34 (d, *J* = 1.2 Hz, 1H), 3.78 (s, 3H); <sup>13</sup>C NMR (100 MHz, CDCl<sub>3</sub>): δ 55.36, 113.0, 113.6, 127.8, 128.2, 128.4, 129.5, 134.0, 141.9, 149.6, 159.4; HRMS calc. for C<sub>15</sub>H<sub>15</sub>O [M+H]<sup>+</sup>: 211.1117. Found: 211.1118

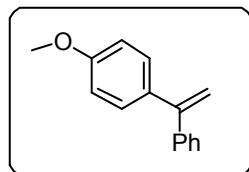

**1-chloro-4-(1-phenylvinyl)benzene**<sup>10</sup>: (71% two-step yield); <sup>1</sup>H-NMR (400MHz, CDCl<sub>3</sub>): δ 5.47 (s, 1H), 5.49 (s, 1H), 7.28-7.35 (m, 8H); <sup>13</sup>C-NMR (100 MHz, CDCl<sub>3</sub>): δ 114.8, 128.0, 128.3, 128.4, 128.5, 129.7, 133.7, 140.1, 141.1, 149.1.

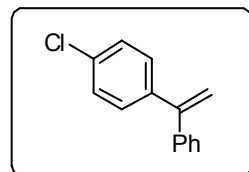

<sup>8</sup> Meng, L.; Su, J.; Zha, Z.; Zhang, L.; Zhang, Z.; Wang, Z. *Chem. Eur. J.* **2013**, 19, 5542-5545

<sup>9</sup> Alacid, E.; Najera, C. *J. Org. Chem.* **2008**, 73, 2315

<sup>10</sup> Zou, Y.; Qin, L.; Ren, X.; Lu, Y.; Li, Y. Zhou, J. *Chem Eur. J.* **2013**, 3504-3511.

The spectra show the formation of vinyl triflate **10a** in reactions containing varying amounts of water after 3 h (Table 4). With high vacuum dried Zn(OTf)<sub>2</sub> and no added water, the reaction gives low conversion to product though in a 3:1 Z:E ratio. With 0.50 eq of water, 90% conversion is achieved but the Z:E ratio is reduced to 1.2:1. Larger amounts of water (1.5 eq) actually led to reduced conversion (70%) and a complete loss of Z:E selectivity.

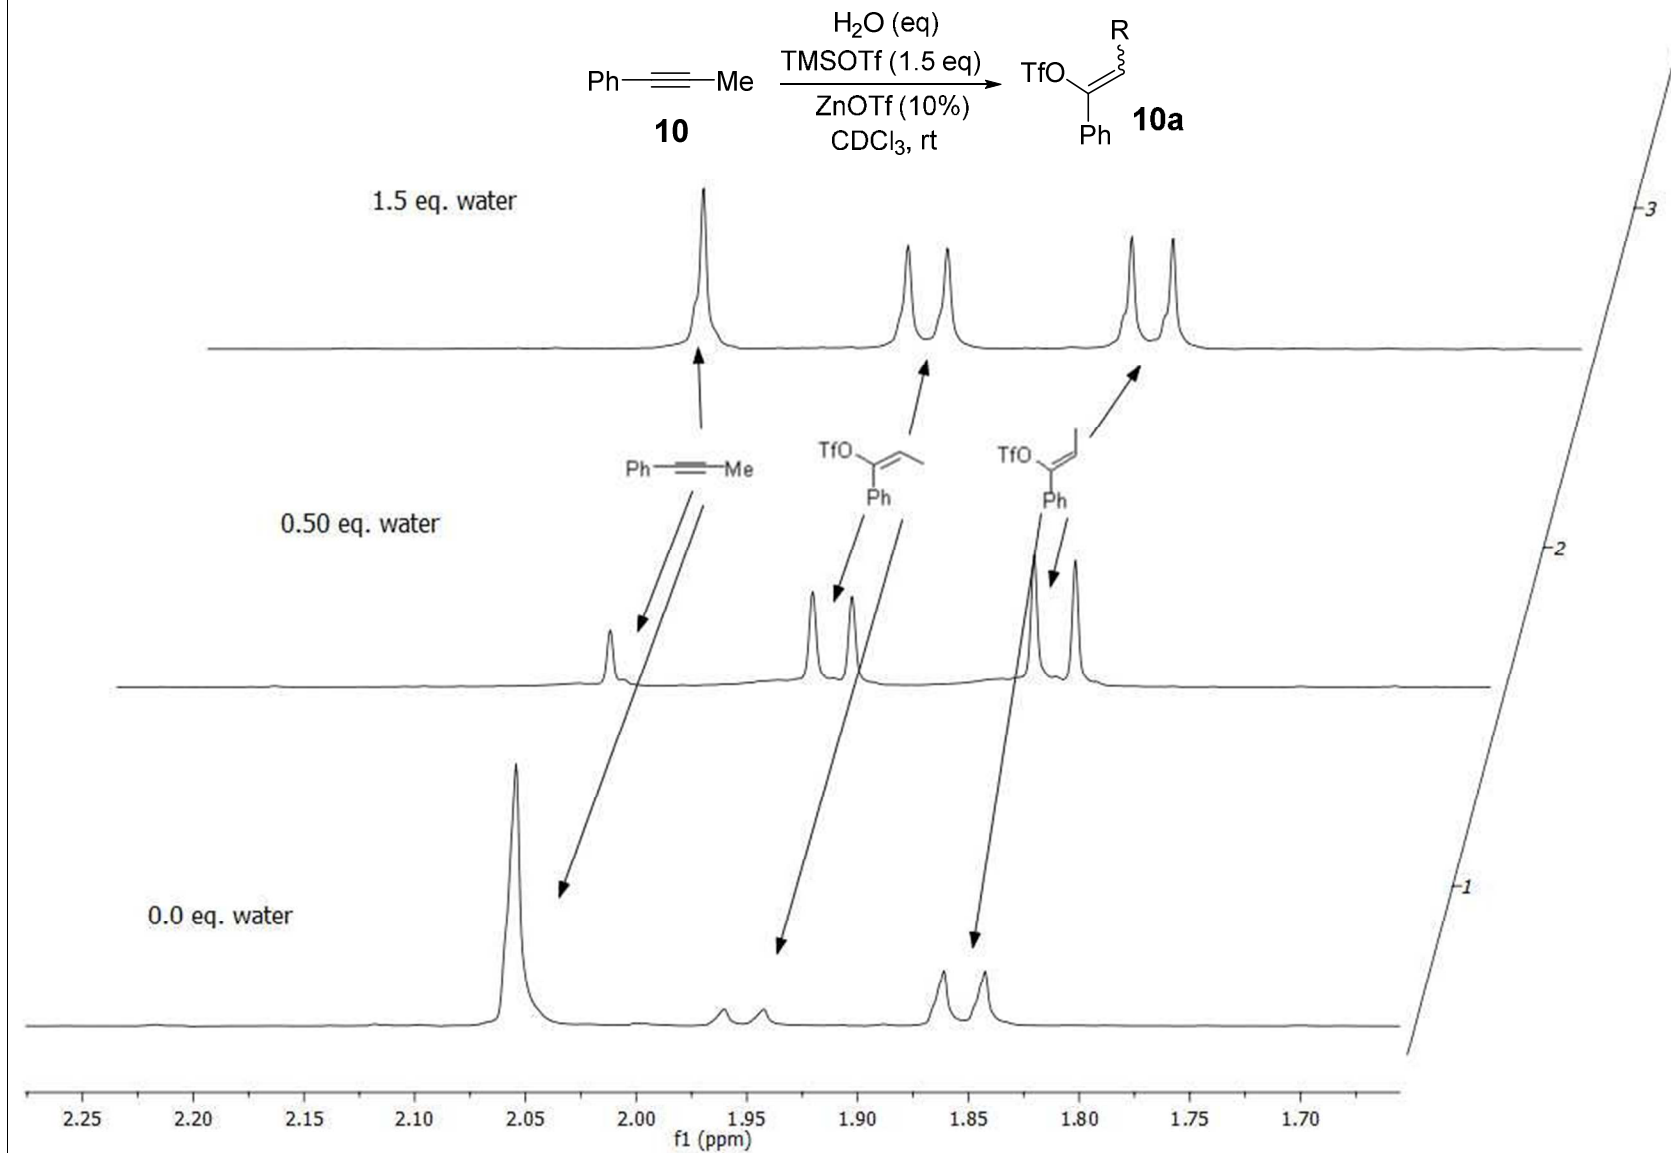

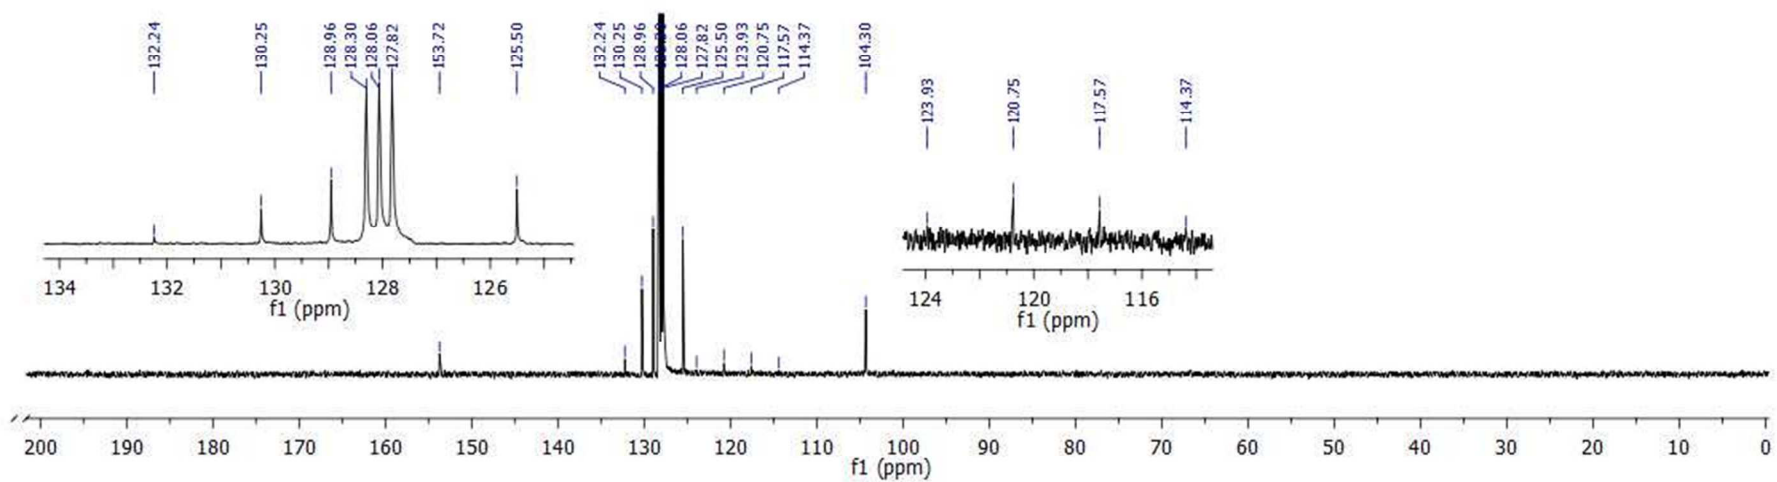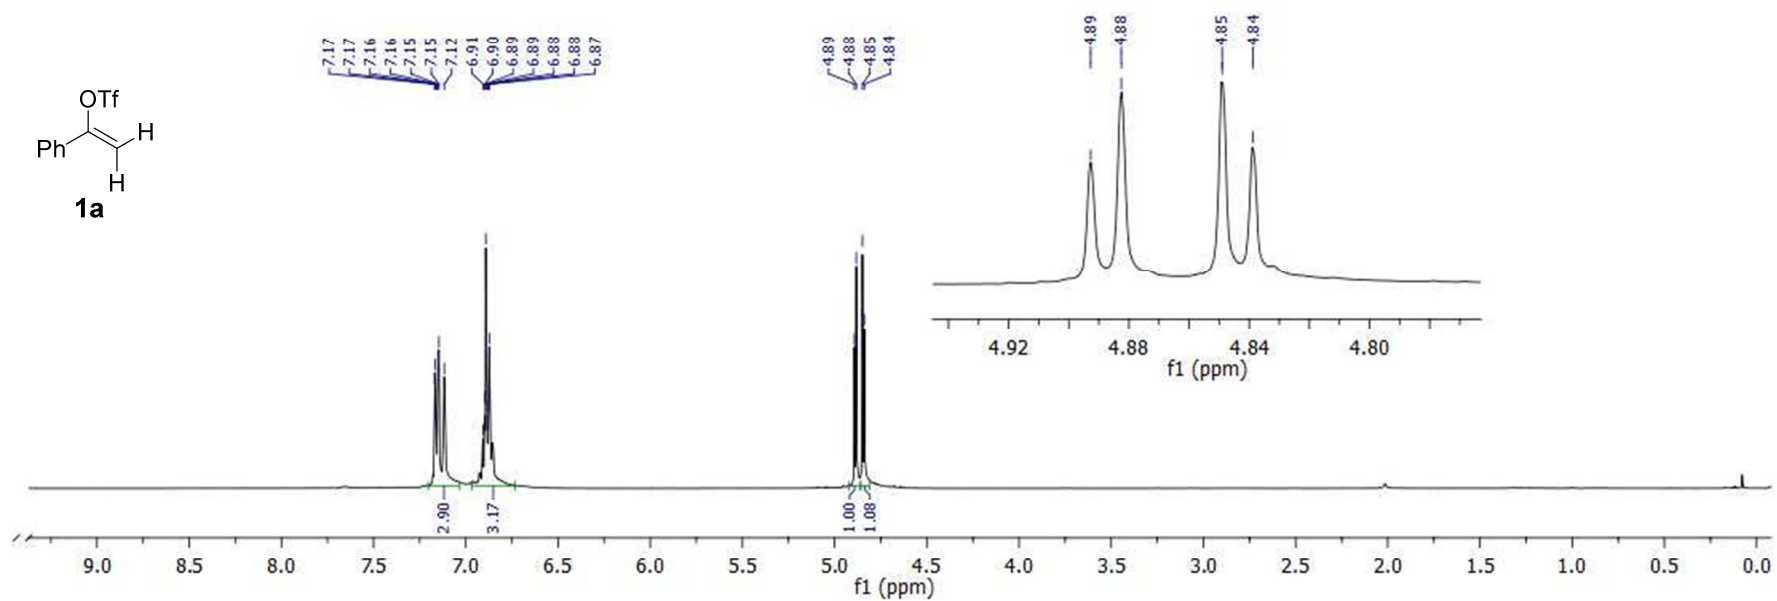

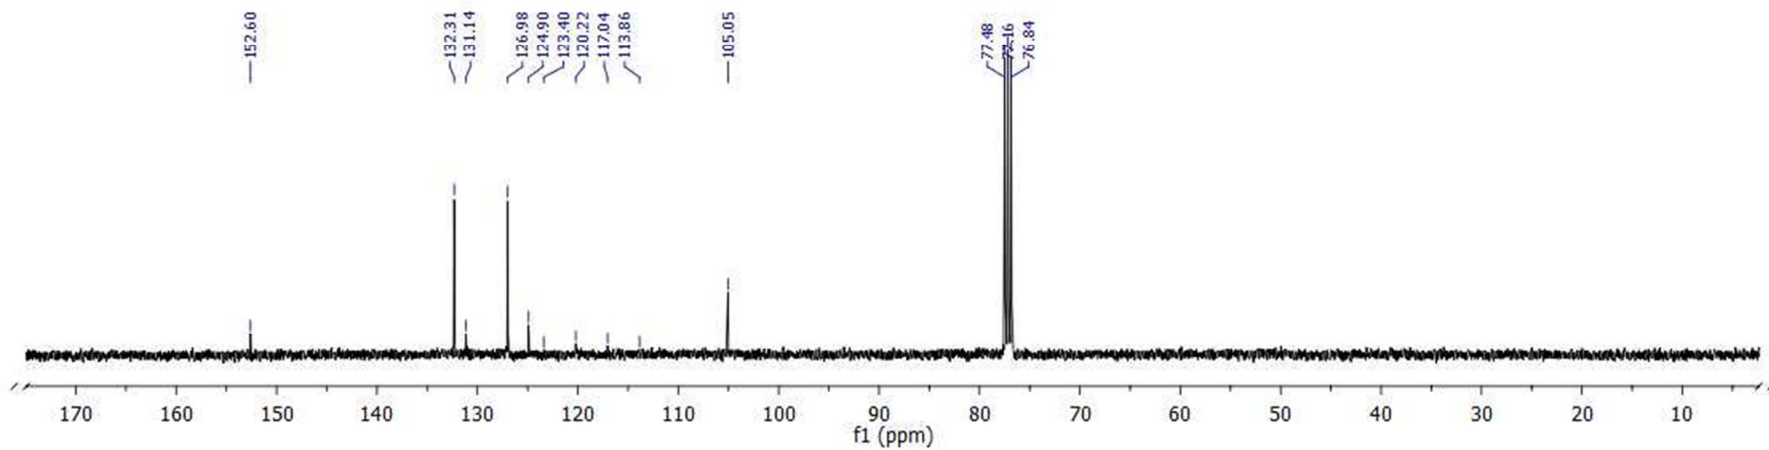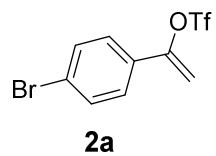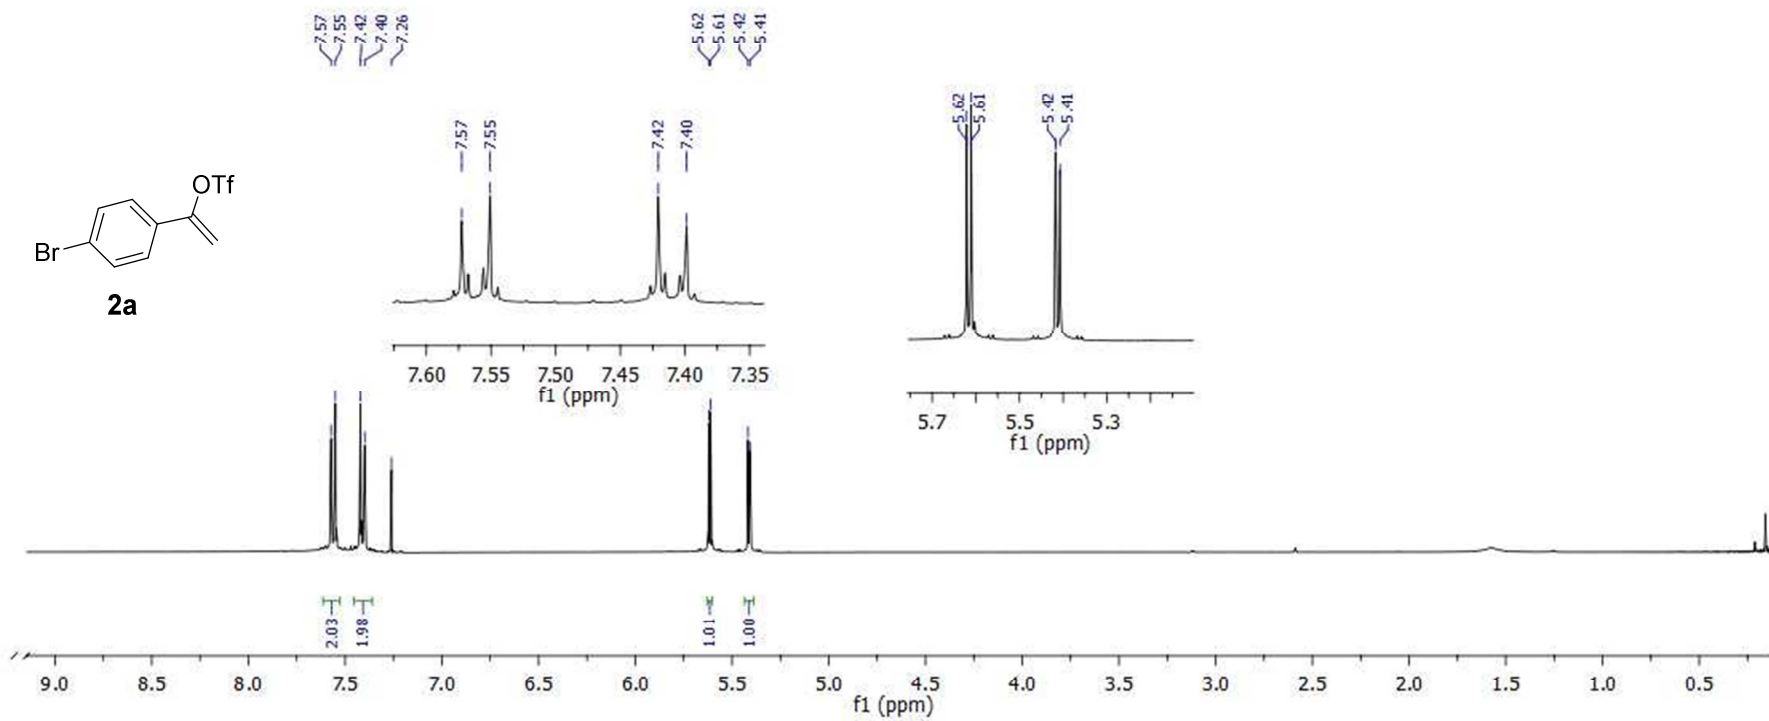



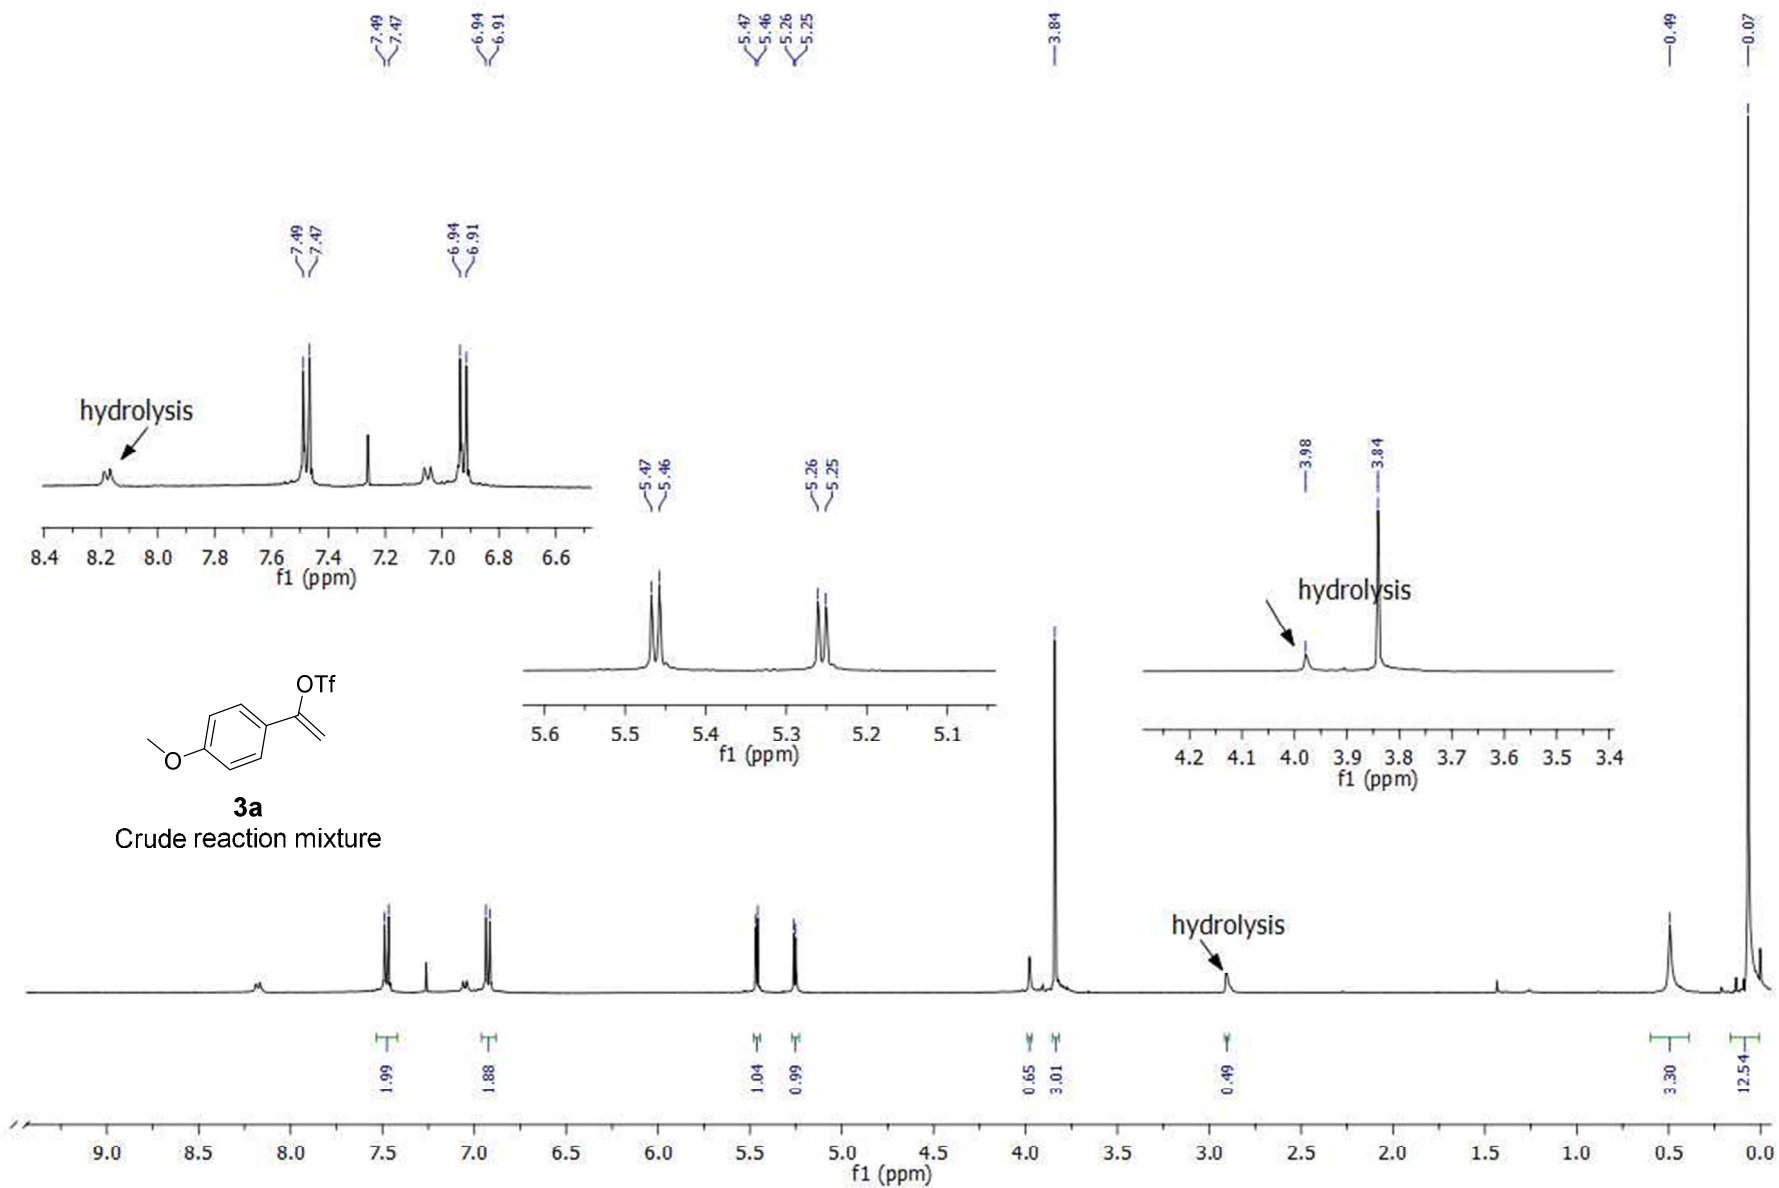

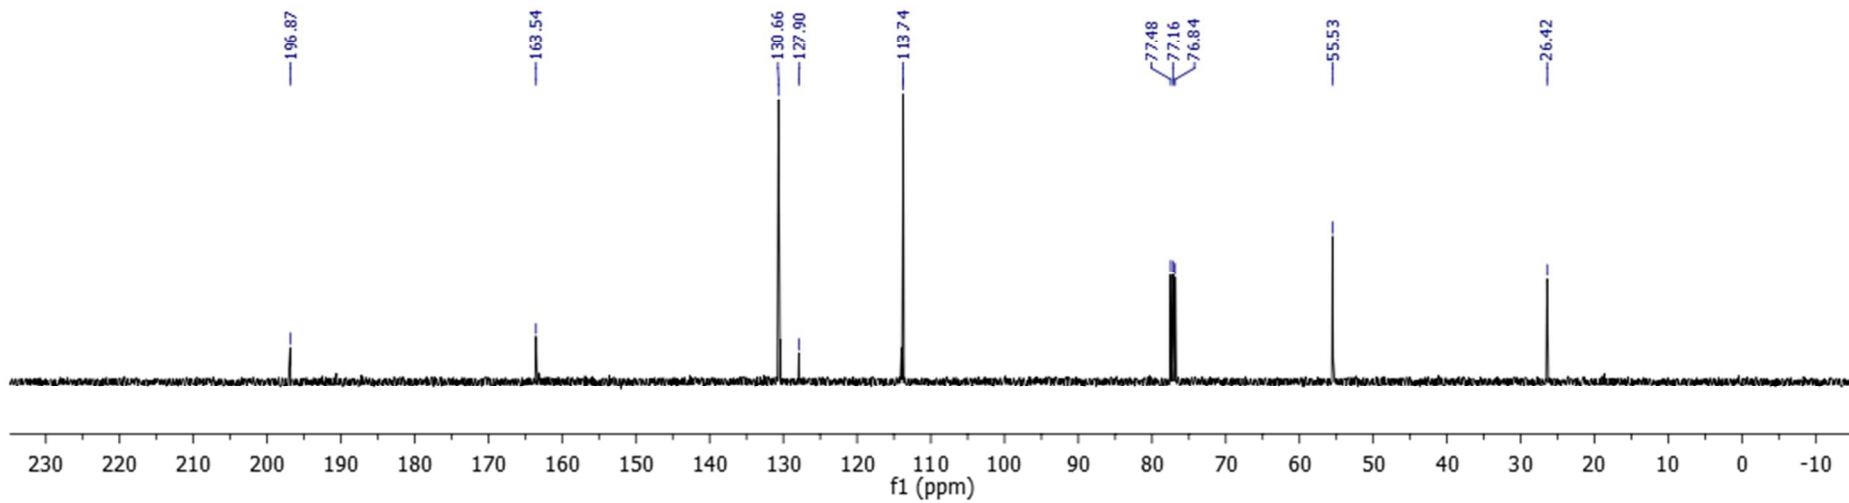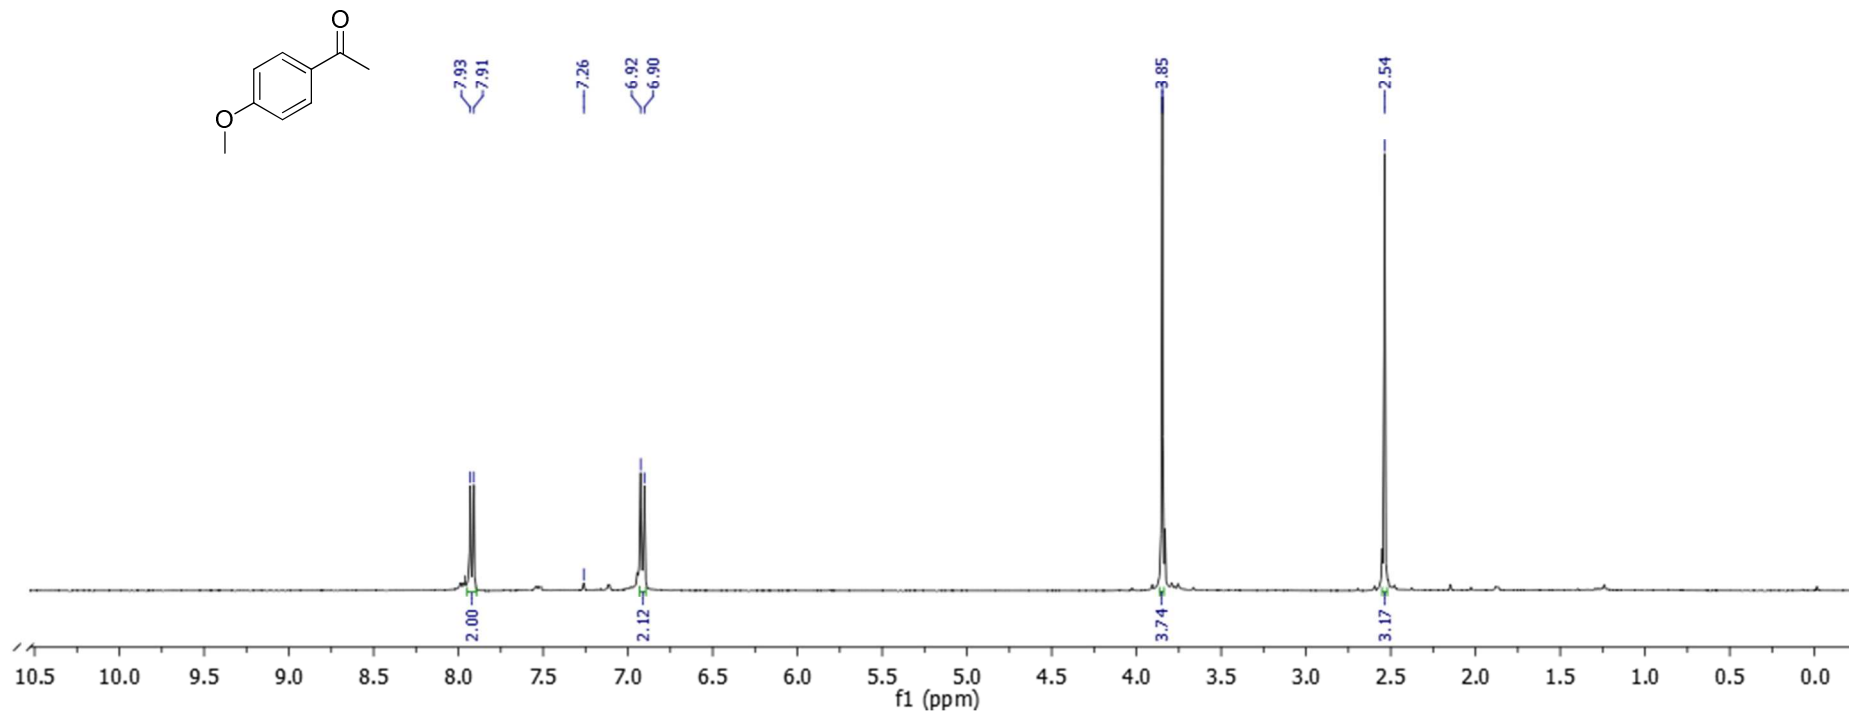

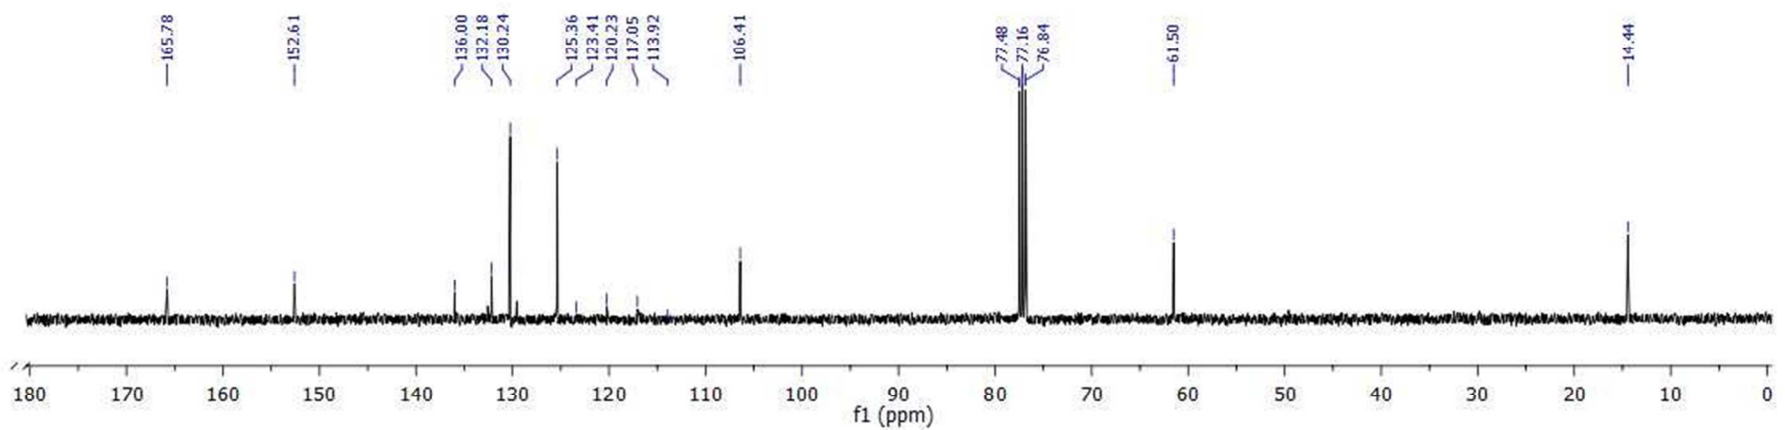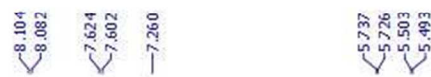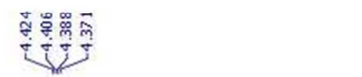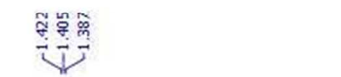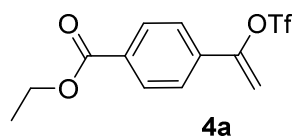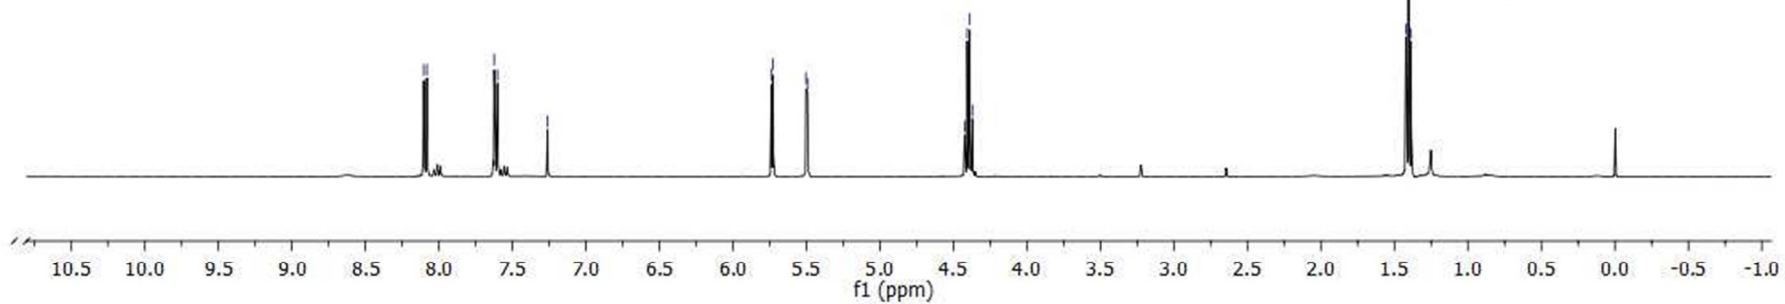

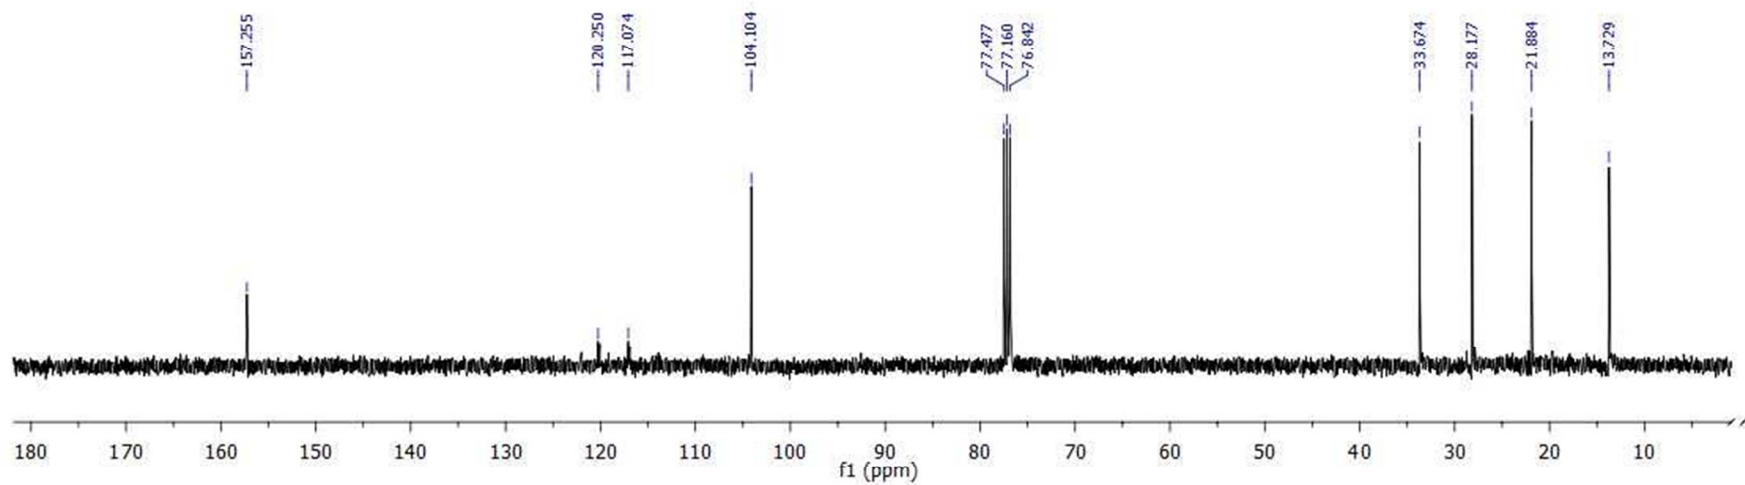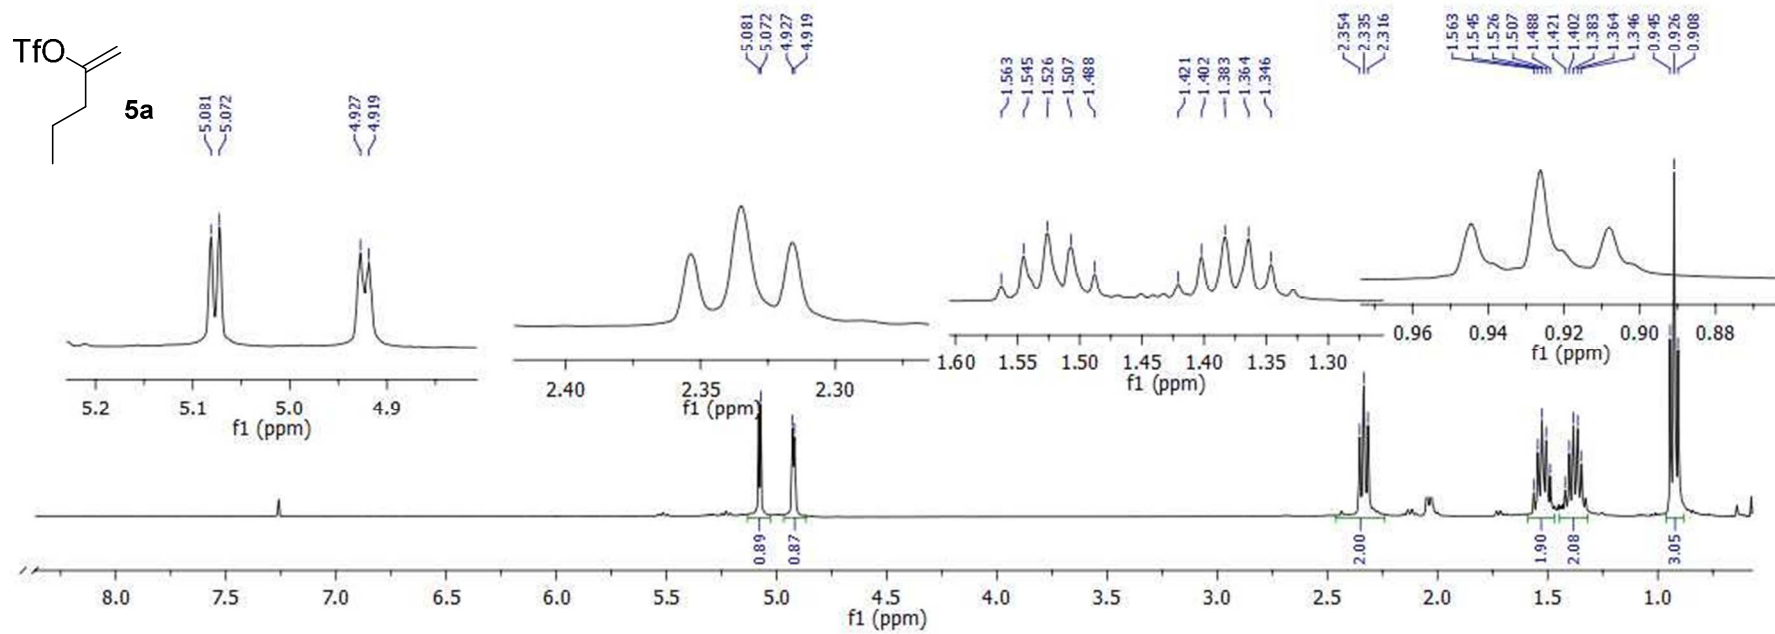

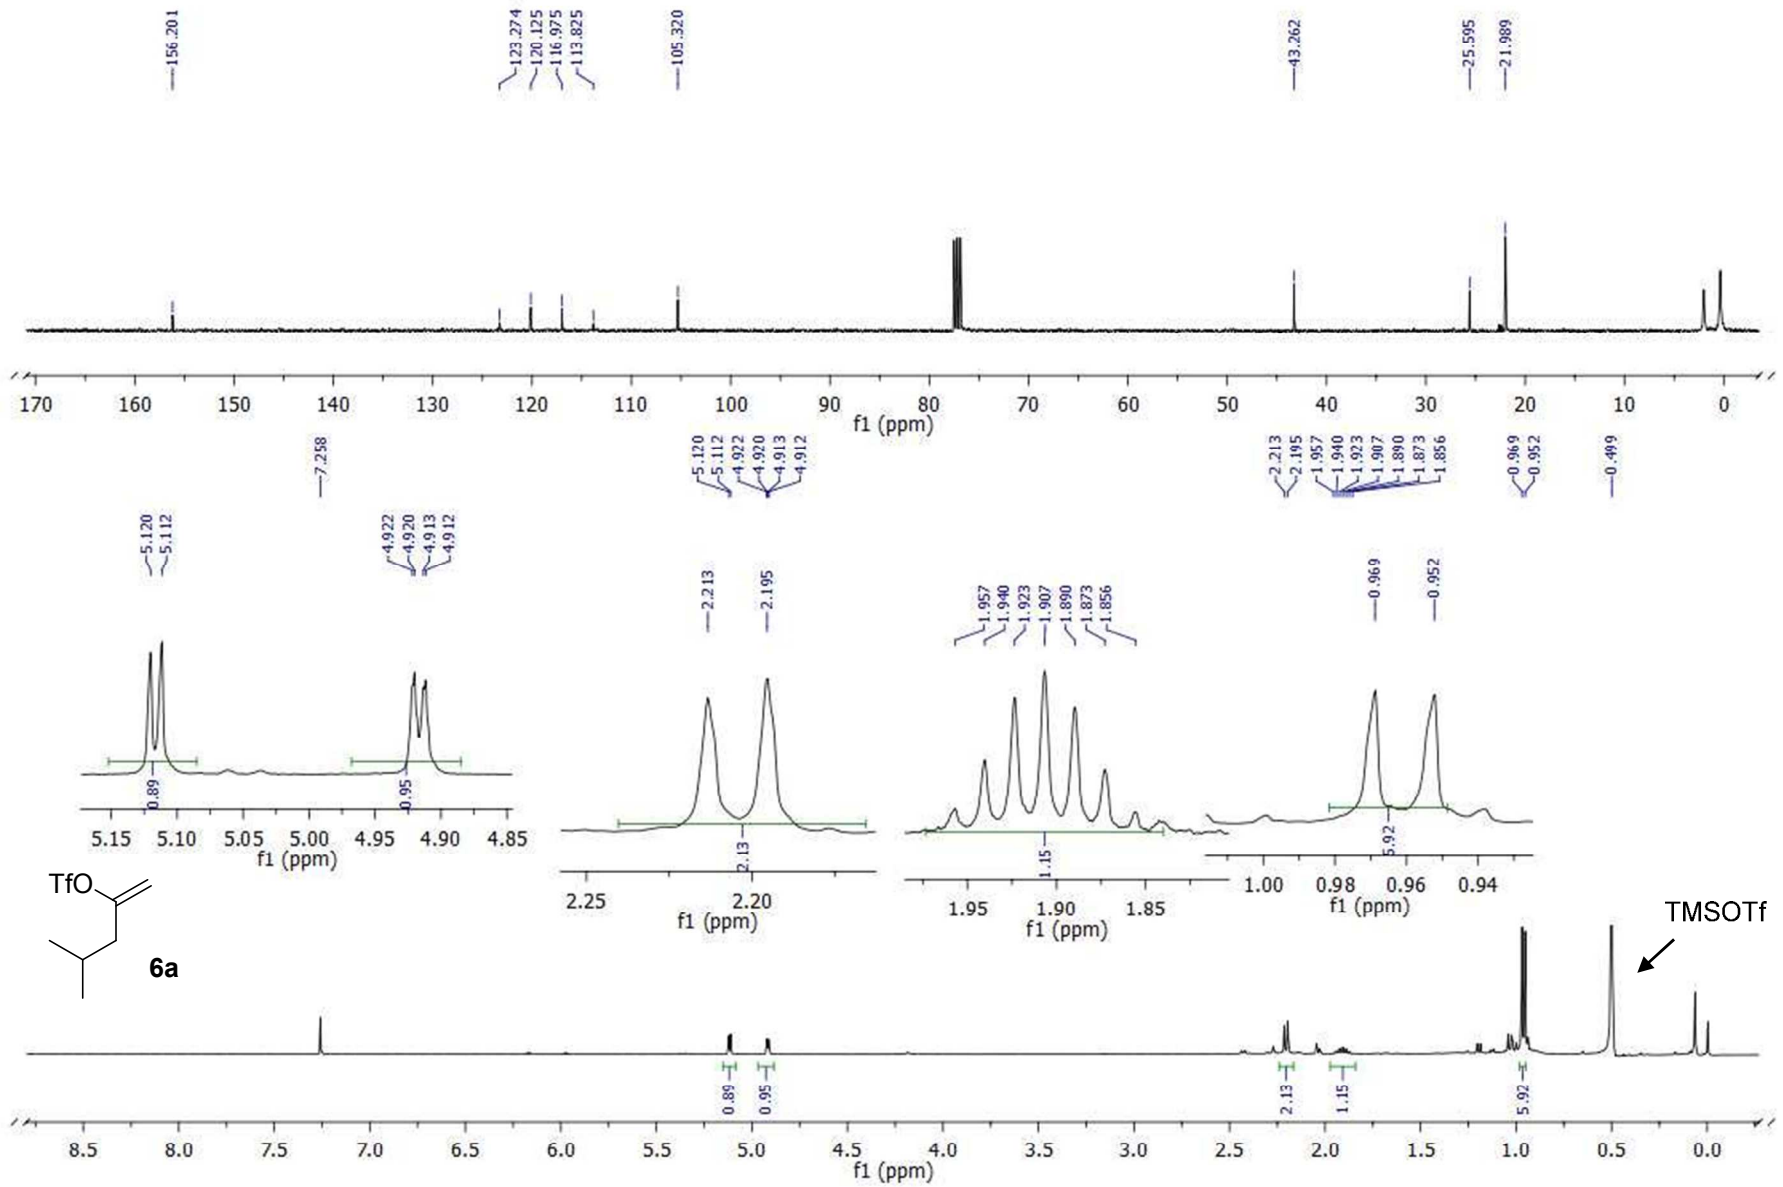

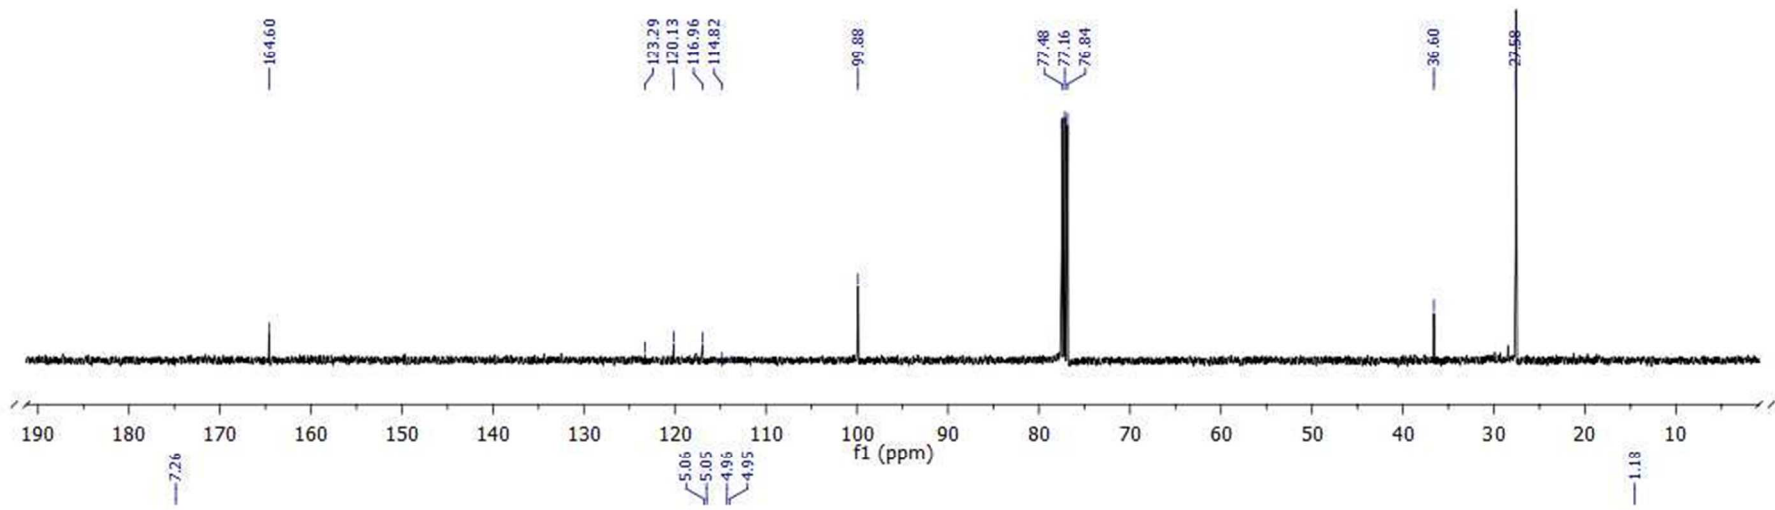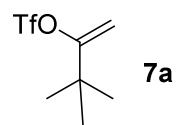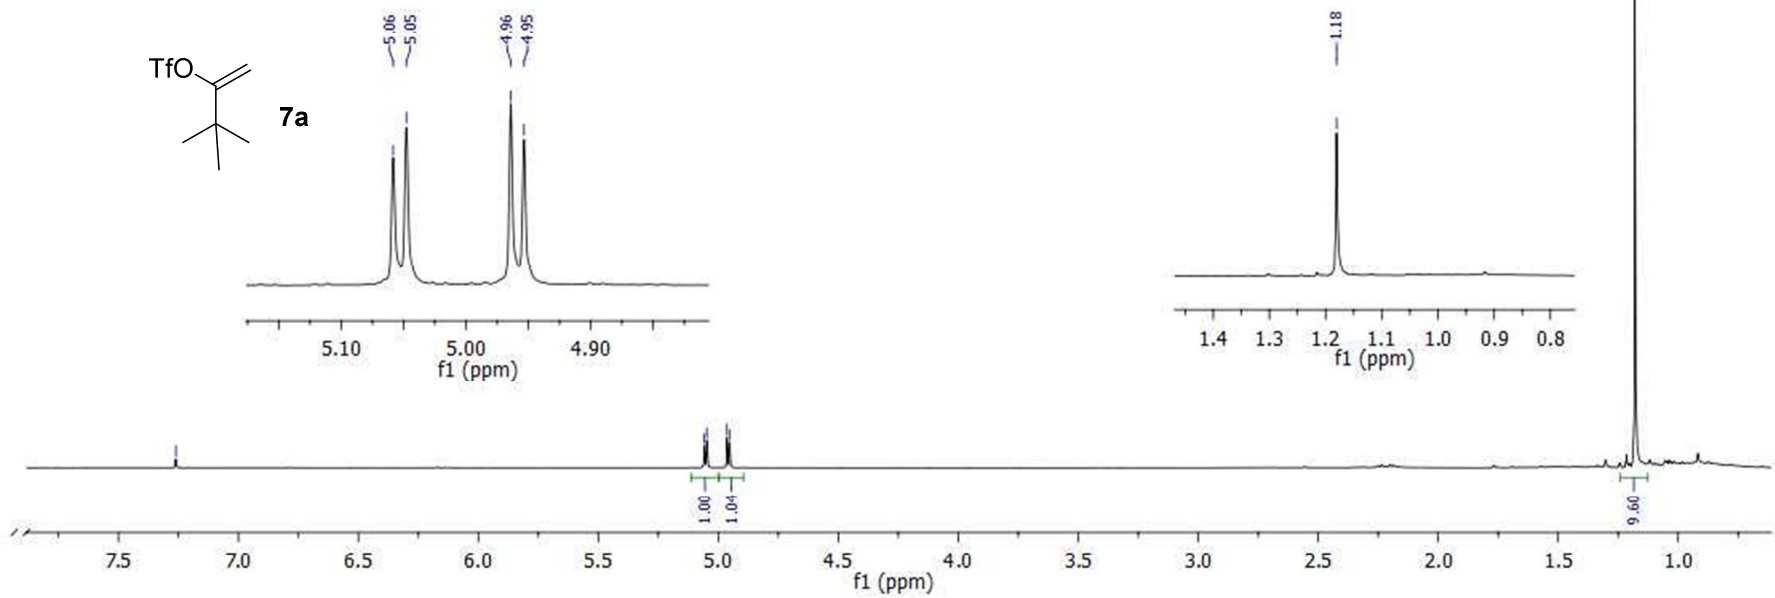

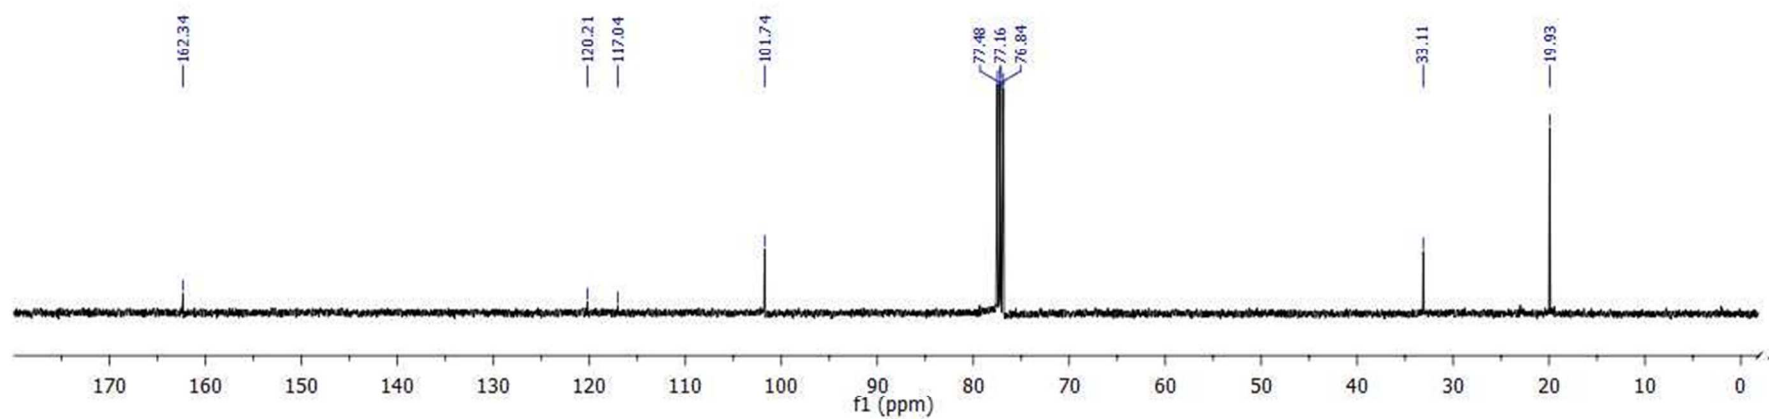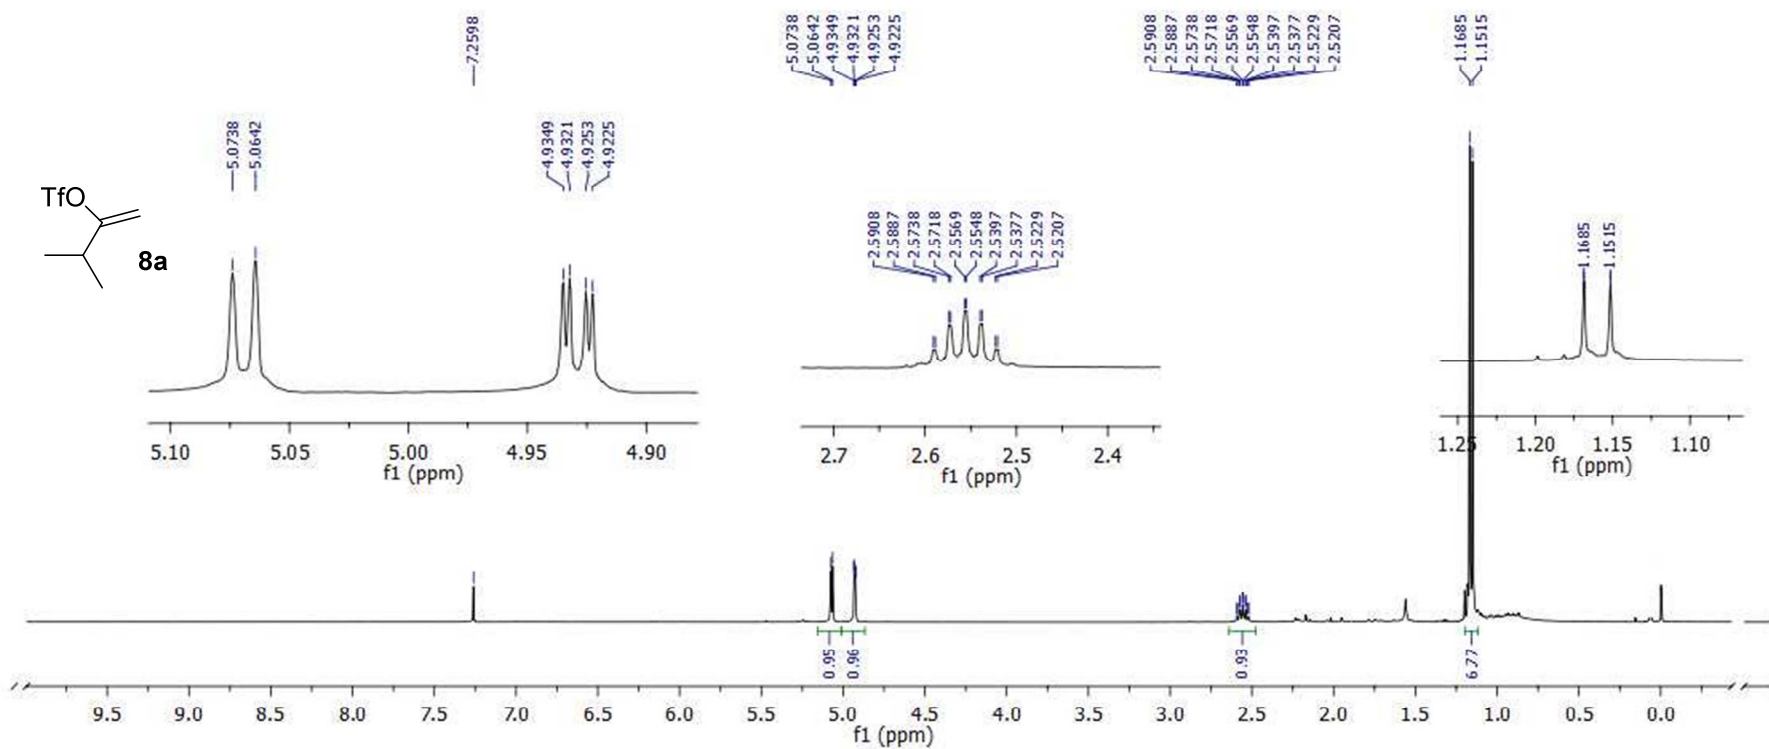



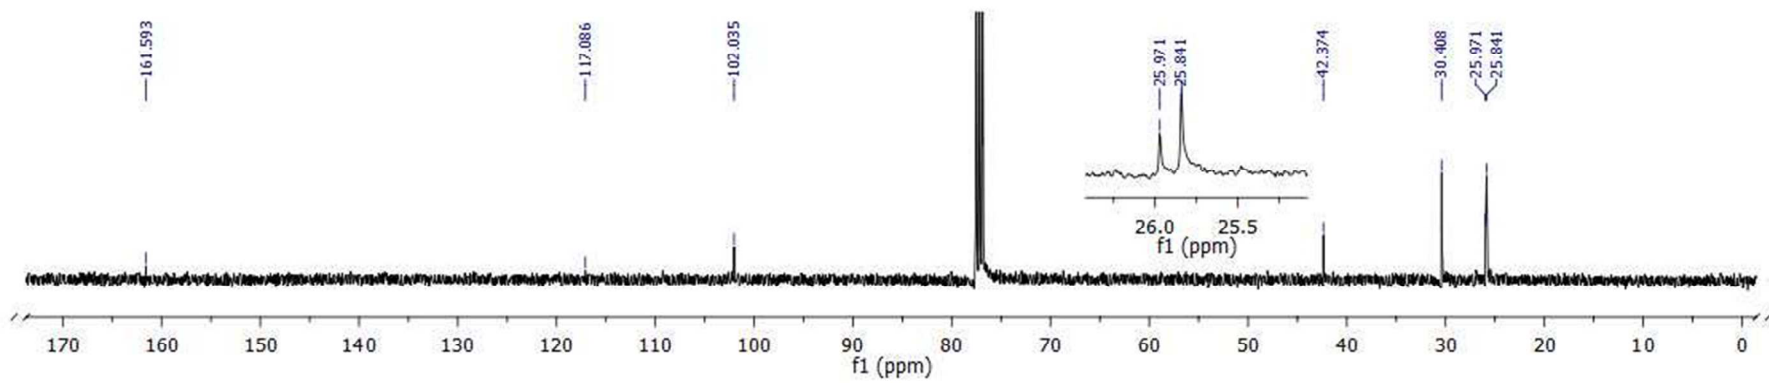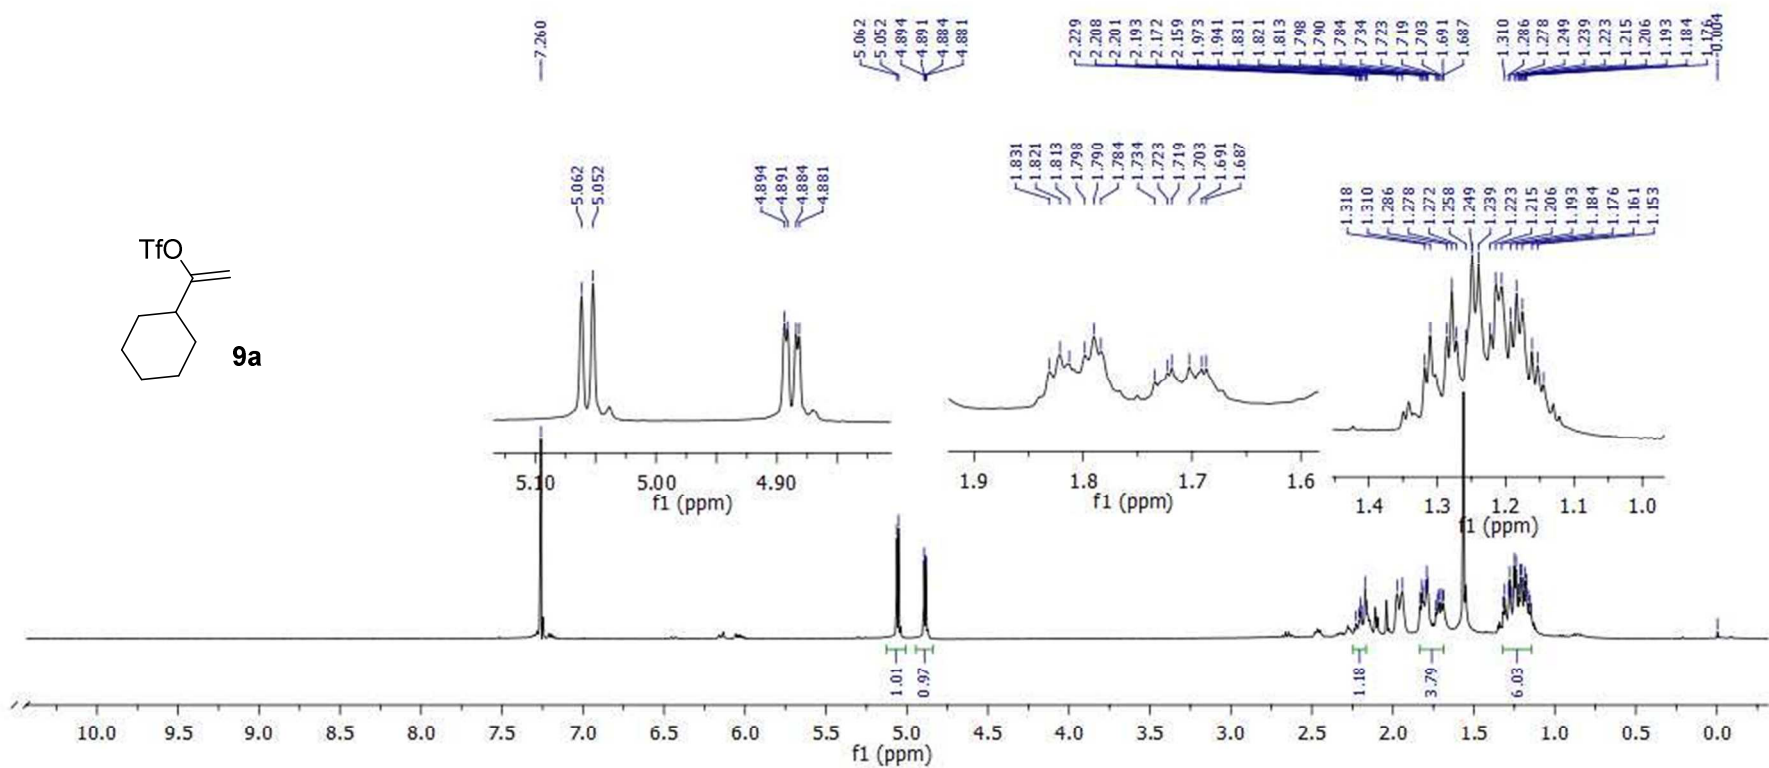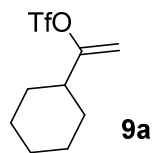



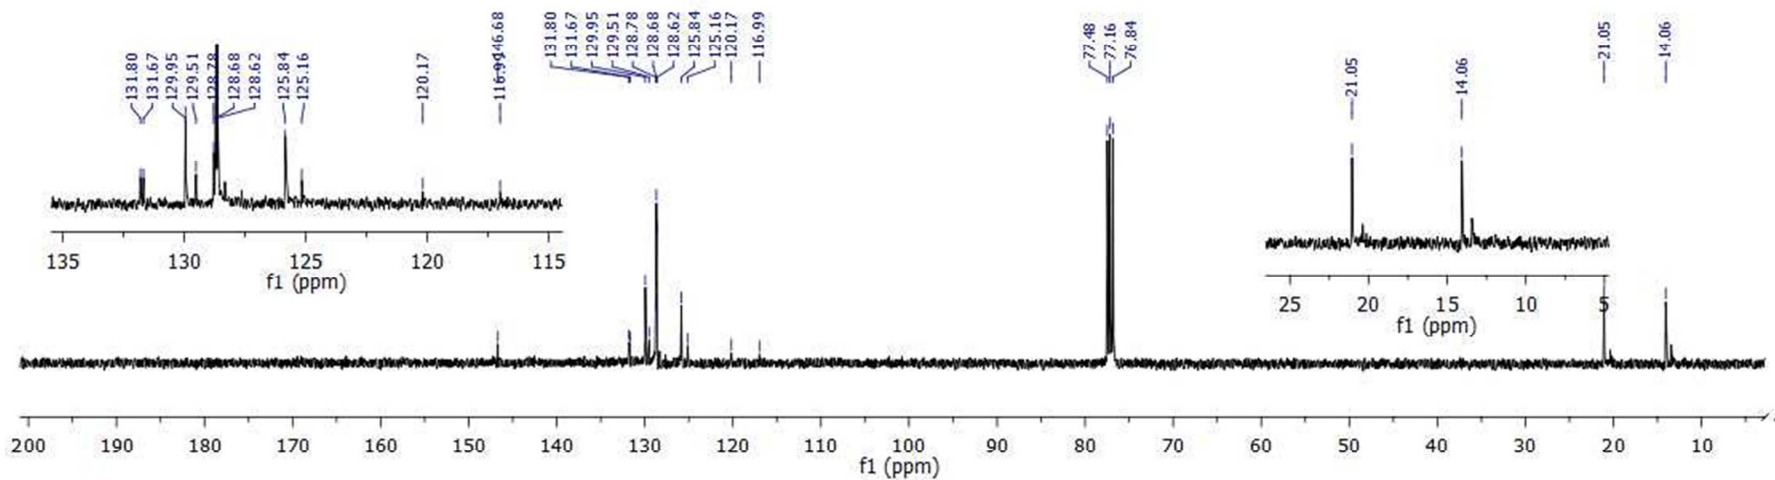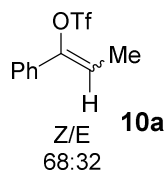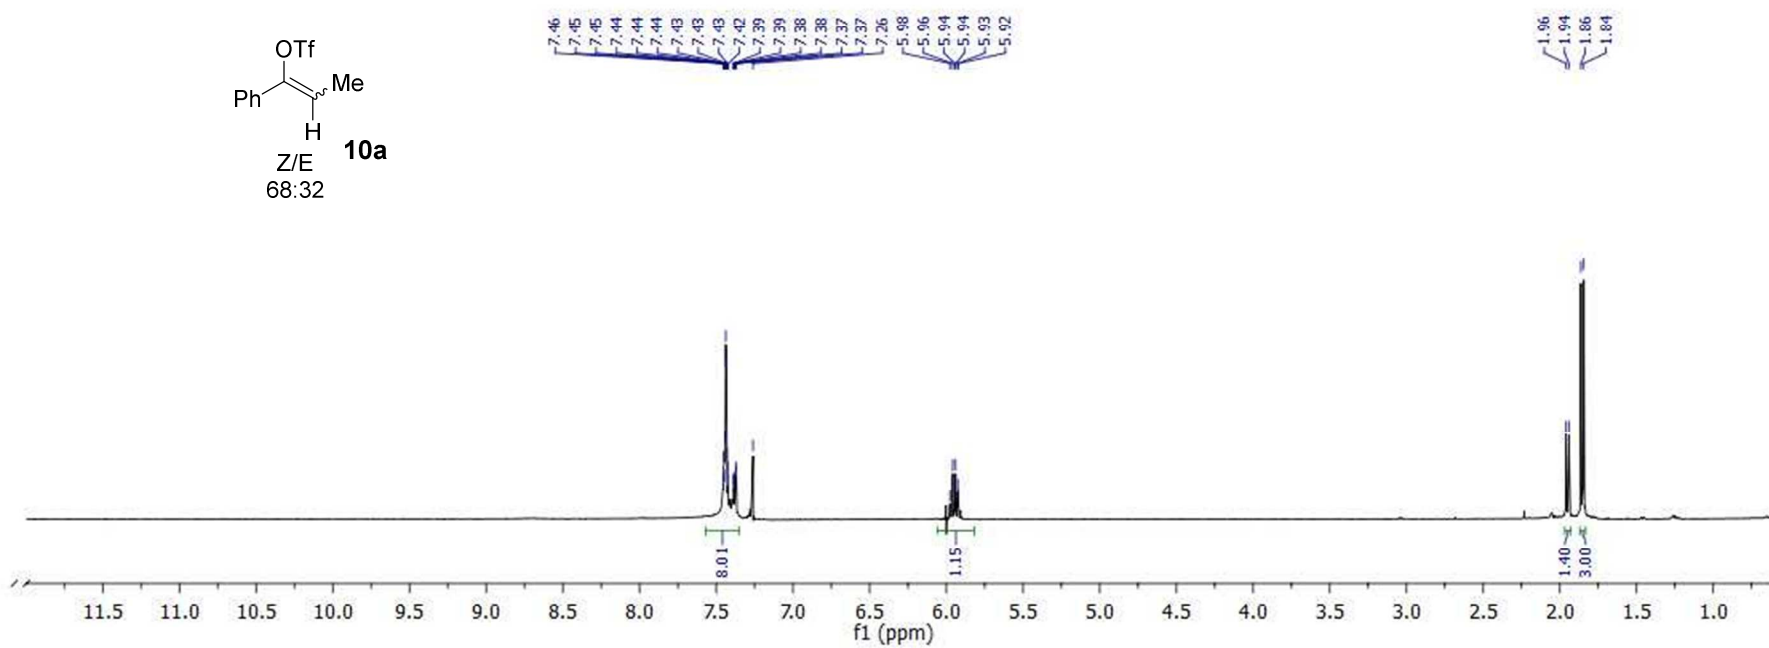

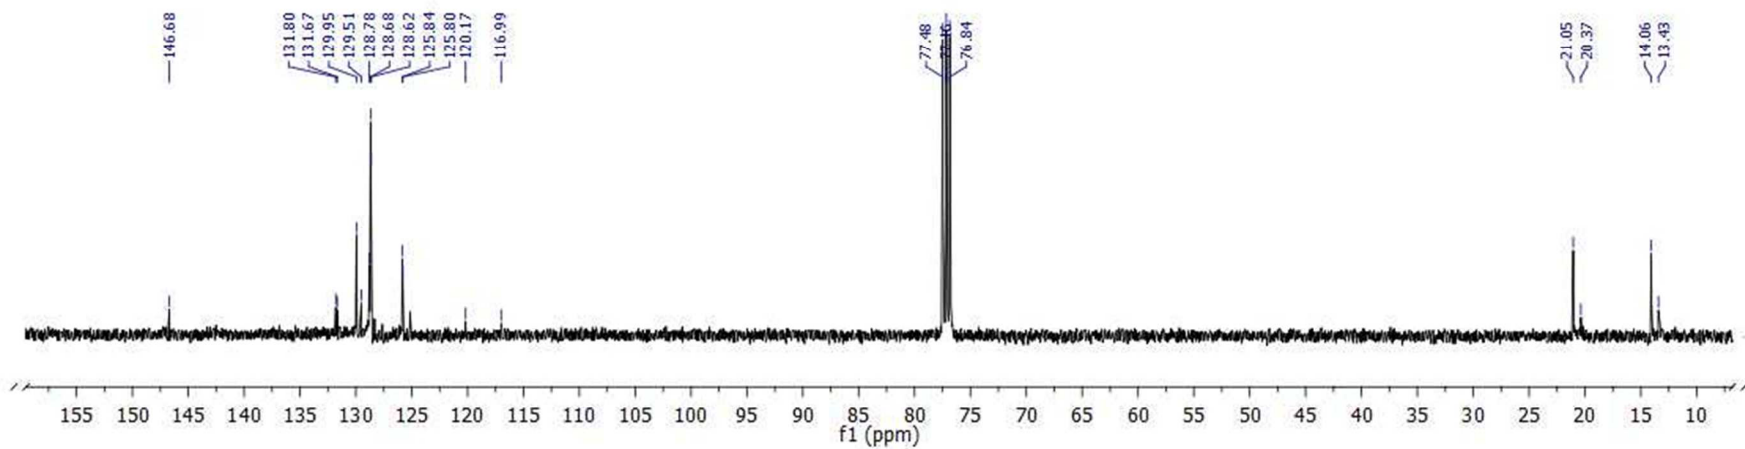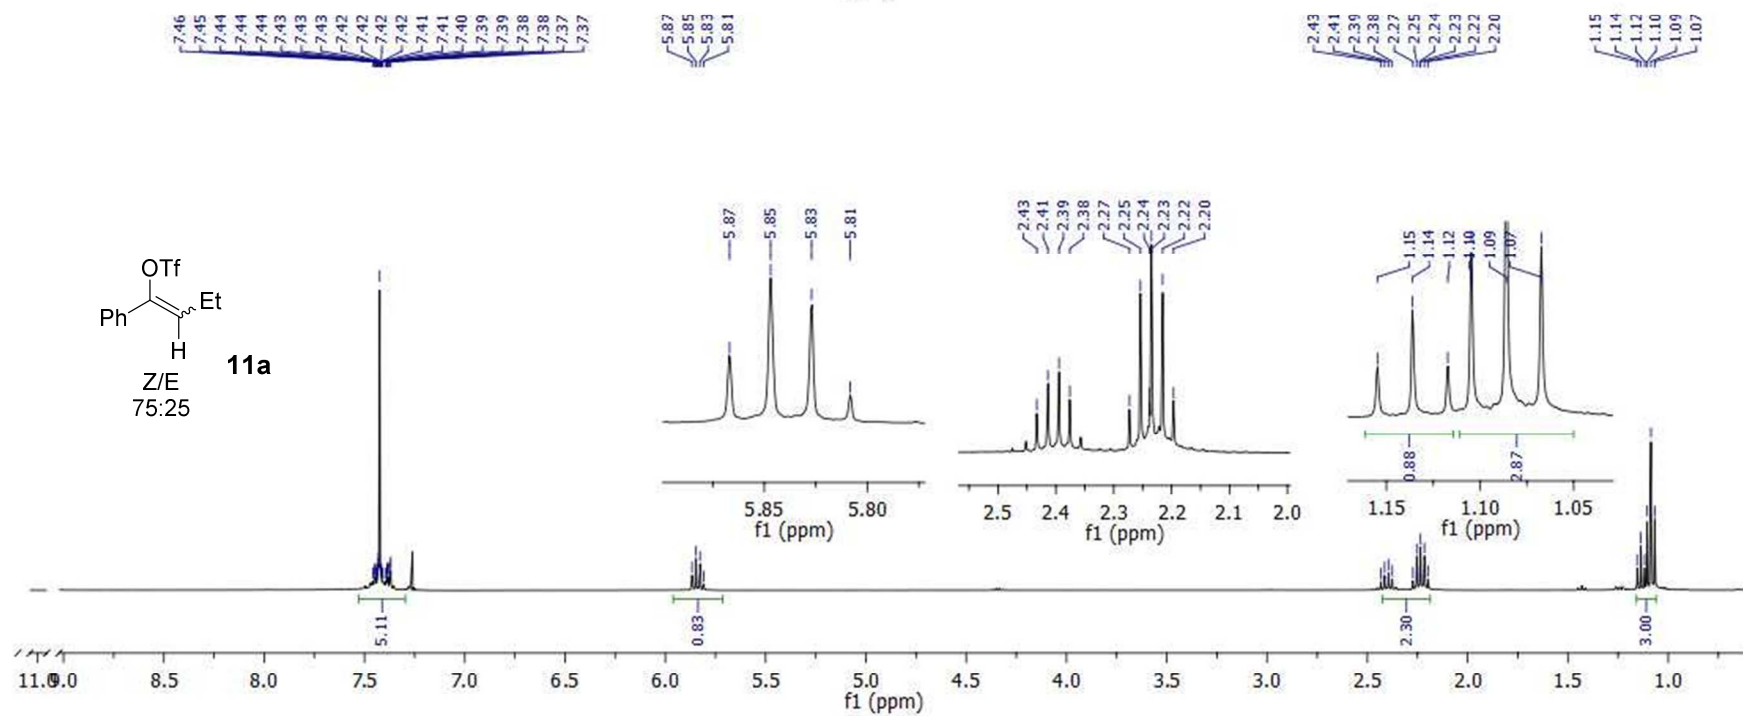

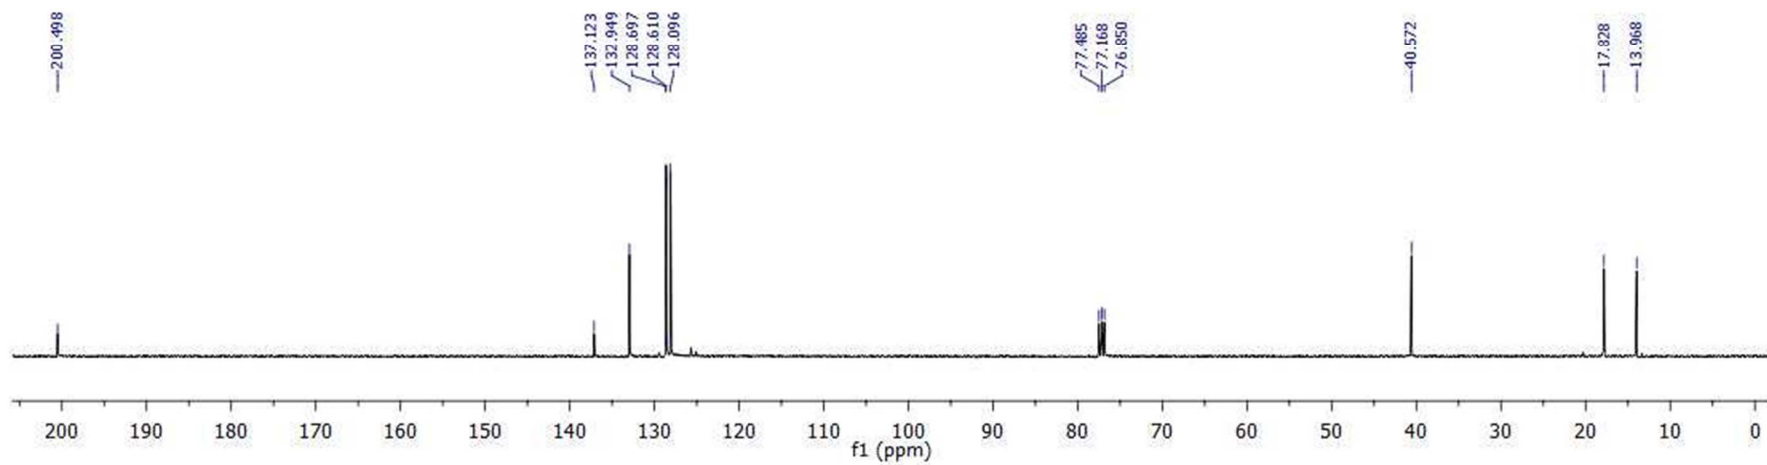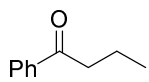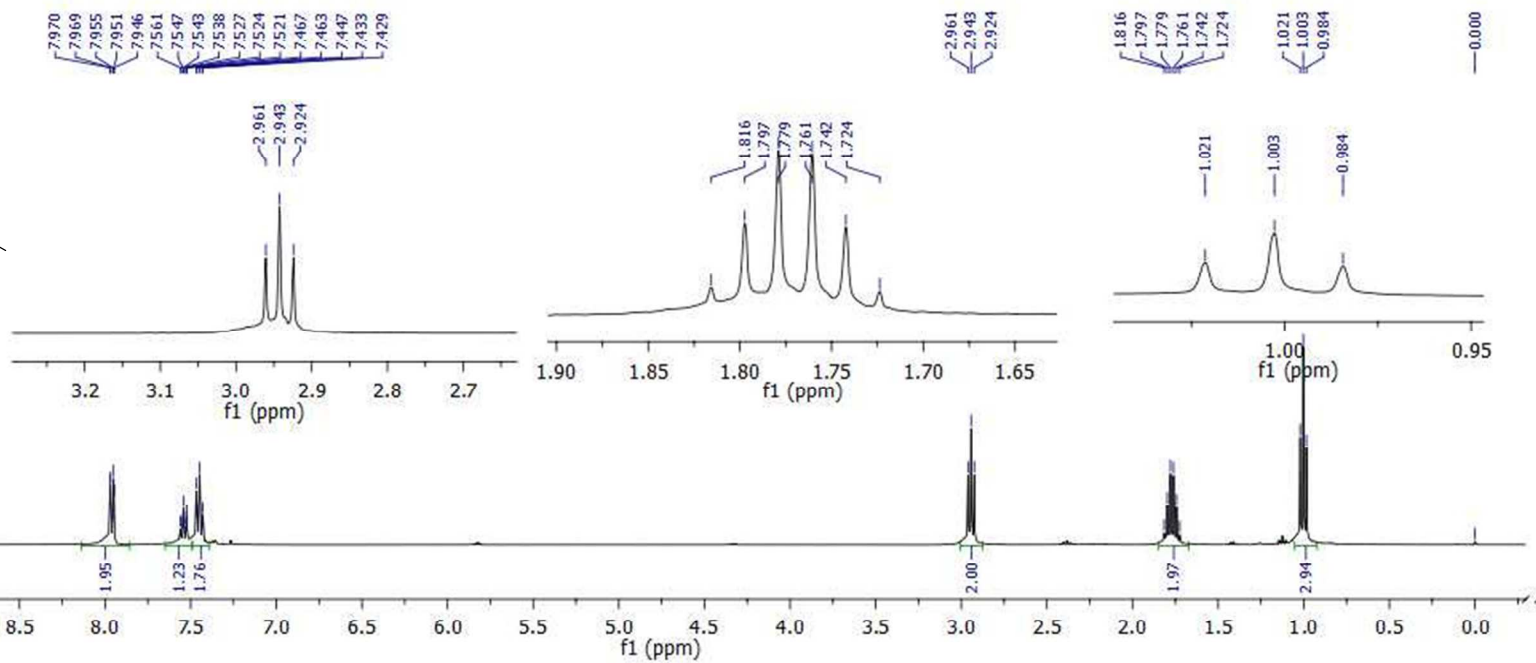

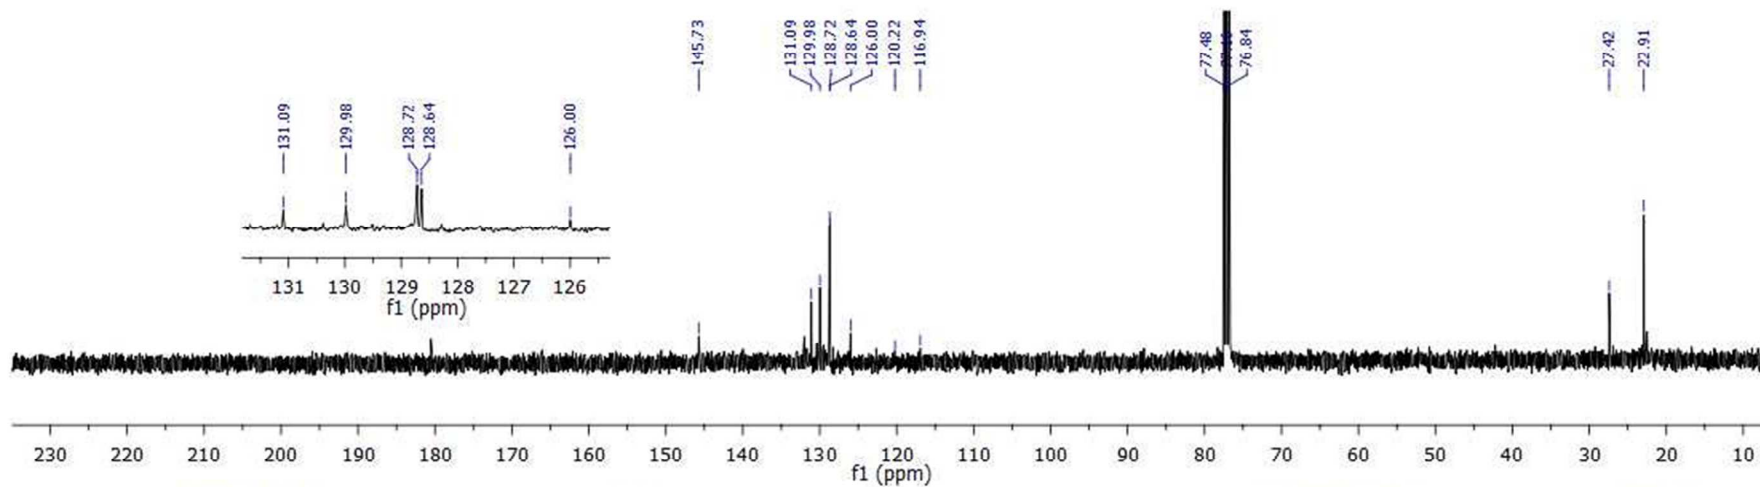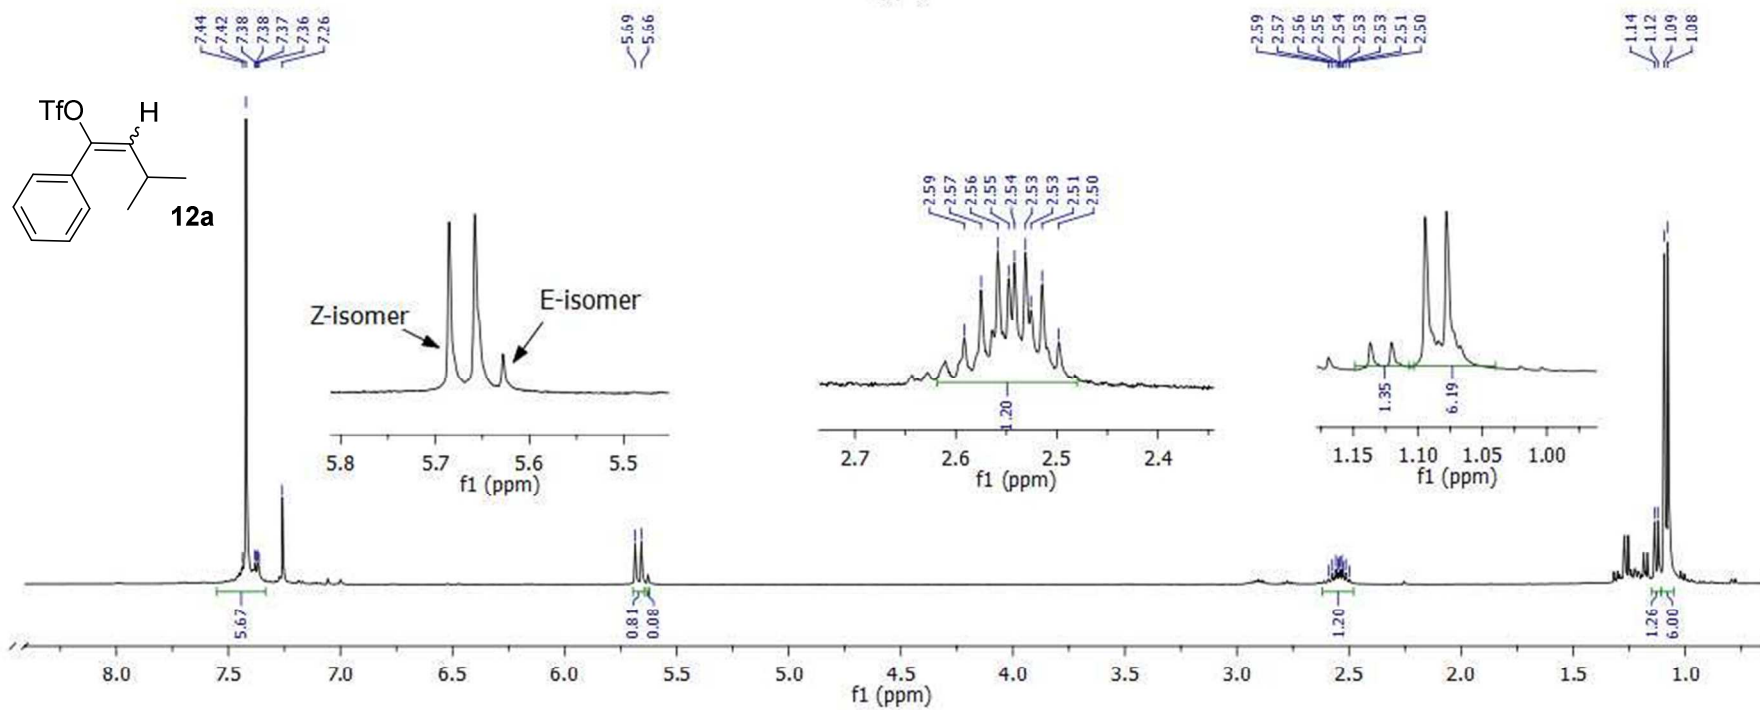

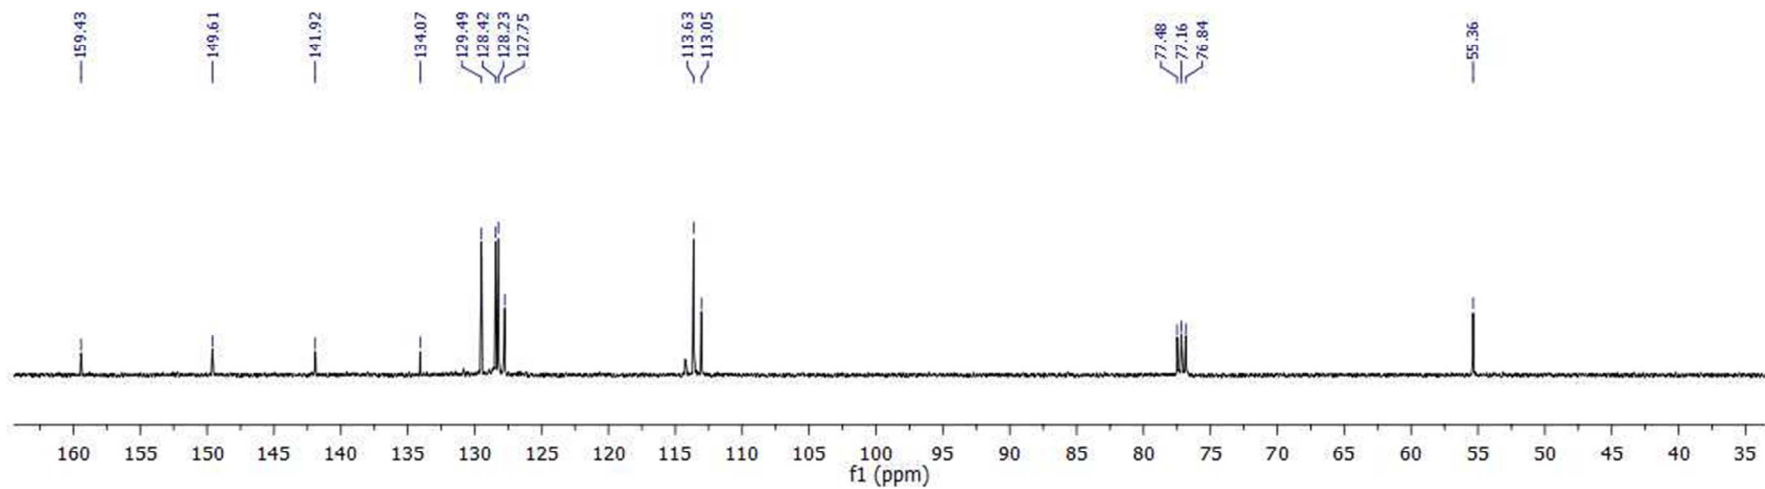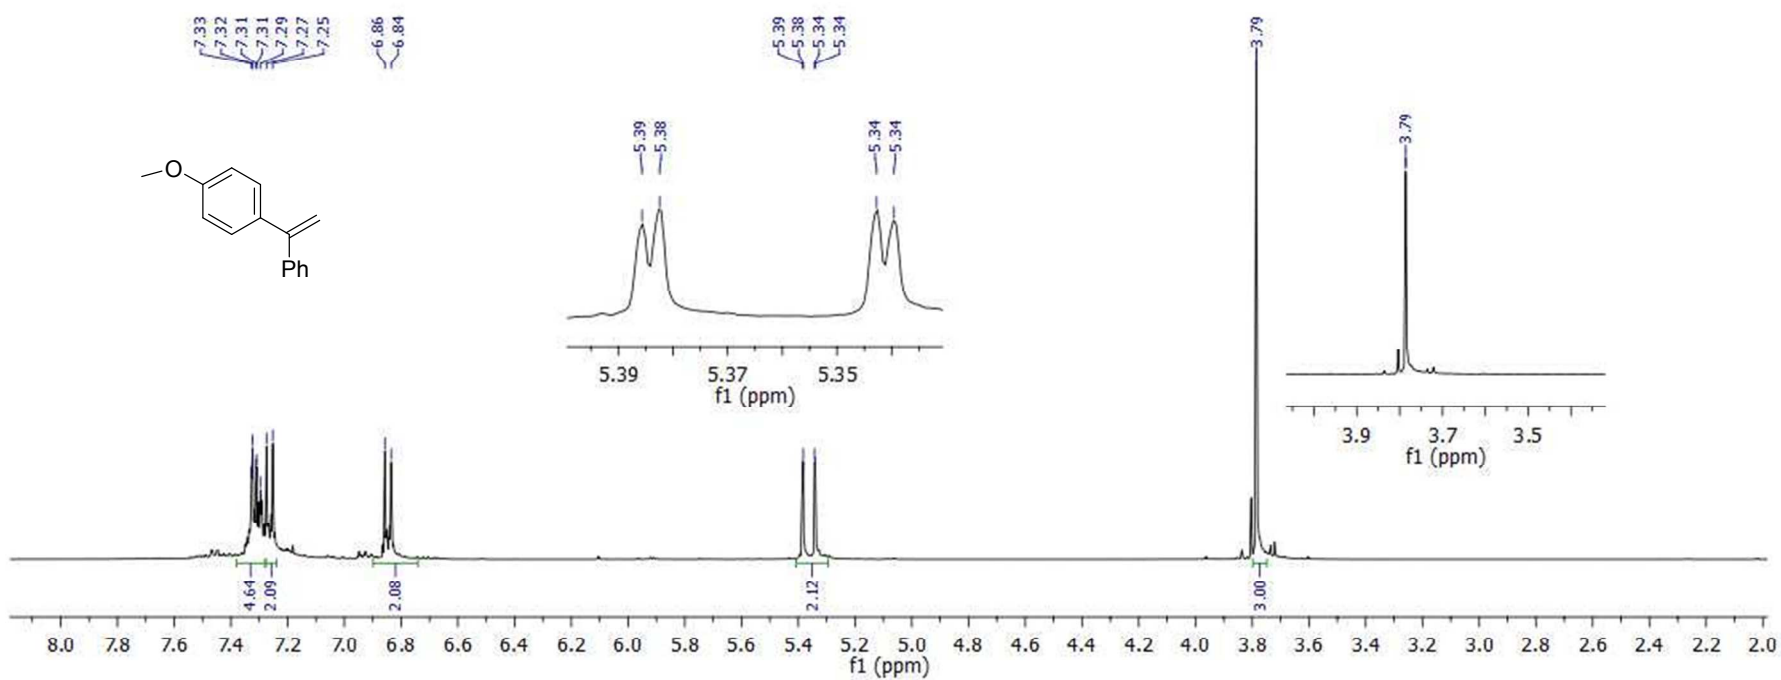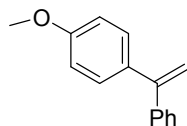

Supplement: ol501852n_si_001.pdf [file ol501852n_si_001.pdf]
